# 1 Endogenous retroviruses transcriptional modulation after severe 2 infection, trauma and burn

3  
4 **Olivier Tabone<sup>1</sup>, Marine Mommert<sup>1,2</sup>, Camille Jourdan<sup>1</sup>, Elisabeth Cerrato<sup>1</sup>, Matthieu  
5 Legrand<sup>3</sup>, Alain Lepape<sup>4</sup>, Bernard Allaouchiche<sup>4,5</sup>, Thomas Rimmelé<sup>1</sup>, Alexandre Pachot<sup>1</sup>,  
6 Guillaume Monneret<sup>1,6</sup>, Fabienne Venet<sup>1,6</sup>, François Mallet<sup>1,2</sup>, Julien Textoris<sup>1,7,\*</sup>**

7  
8 <sup>1</sup> EA7426 Hospices Civils de Lyon – bioMérieux – UCBL1 “Pathophysiology of Injury Induced  
9 Immunosuppression”, Groupement Hospitalier Edouard Herriot, Lyon, France.

10 <sup>2</sup> Joint research unit, Hospice Civils de Lyon, bioMérieux, Centre Hospitalier Lyon Sud, Pierre-  
11 Benite, France

12 <sup>3</sup> Department of Anesthesiology and Critical Care and Burn Unit, Groupe Hospitalier St-Louis-  
13 Lariboisière, Assistance publique - Hôpitaux de Paris, Paris, France.

14 <sup>4</sup> Hospices Civils de Lyon, Intensive Care Unit, Centre Hospitalier Lyon Sud, Pierre Bénite,  
15 France.

16 <sup>5</sup> Agressions Pulmonaires et Circulatoires dans le Sepsis APCSe VetAgro Sup UPSP 2016.A101,  
17 Centre Hospitalier Lyon-Sud, Pierre Bénite, France.

18 <sup>6</sup> Hospices Civils de Lyon, Immunology Laboratory, Groupement Hospitalier Edouard Herriot,  
19 Lyon, France.

20 <sup>7</sup> Hospices Civils de Lyon, Department of Anaesthesiology and Critical Care Medicine,  
21 Groupement Hospitalier Edouard Herriot, Université Claude Bernard Lyon 1, Lyon, France.

22  
23 **Correspondence:** Julien Textoris

24 Laboratoire Commun de Recherche bioMérieux / HCL / UCBL1

25 Hôpital E. Herriot, Pavillon P

26 5 place d’Arsonval, 69437 LYON Cedex 03

27 Tel: +33 426 038747; Fax: +33 472 119 547

28 Email: [julien.textoris@biomerieux.com](mailto:julien.textoris@biomerieux.com)

29 ORCID: [orcid.org/0000-0002-3821-9337](https://orcid.org/0000-0002-3821-9337)

30  
31 number of words: 5504

32 number of figures: 10

## 33 34 **Keywords**

35 Endogenous retroviruses – severe inflammatory injuries – septic shock – burn – trauma – transcriptome  
36 – host response.

## 38 **Abstract**

39 Although human endogenous retroviruses (HERVs) expression is a growing subject of interest,  
40 no study focused before on specific endogenous retroviruses loci activation in severely injured  
41 patients. Yet, HERV reactivation is observed in immunity compromised settings like some  
42 cancers and auto-immune diseases. Our objective was to assess the transcriptional modulation of  
43 HERVs in burn, trauma and septic shock patients. We analyzed HERV transcriptome with  
44 microarray data from whole blood samples of a burn cohort (n=30), a trauma cohort (n=105) and  
45 2 septic shock cohorts (n=28, n=51), and healthy volunteers (HV, n=60). We described  
46 expression of the 337 probesets targeting HERV from U133 plus 2.0 microarray in each dataset  
47 and then we compared HERVs transcriptional modulation of patients compared to healthy  
48 volunteers. Although all 4 cohorts contained very severe patients, the majority of the 337 HERVs  
49 was not expressed (around 74% in mean). Each cohort had differentially expressed probesets in  
50 patients compared to HV (from 19 to 46). Strikingly, 5 HERVs were in common in all types of  
51 severely injured patients, with 4 being up-modulated in patients. We highlighted co-expressed  
52 profiles between HERV and nearby gene as well as autonomous HERV expression. We suggest  
53 an inflammatory-specific HERV transcriptional response, and importantly, we introduce that the  
54 HERVs close to immunity-related genes might have a role on its expression.

55

## 56 **Introduction**

57 Human Endogenous Retroviruses (HERVs) are former exogenous retroviruses which have  
58 infected germinal cells and became integrated in our genome million years ago (Young, Stoye,  
59 and Kassiotis 2013). These rare events happened several times in evolution. As retrotransposons,  
60 they are able to duplicate across the genome and they represent today more than 8% of our  
61 genome. Each insertion therefore led to distinct groups or families, each including multiple  
62 copies. Current classification annotates around 100 such groups.

63 HERV loci initially shared a common structure with exogenous retroviruses: internal  
64 protein coding regions (*gag*, *pro*, *pol*, *env*) flanked by two identical Long Terminal Repeats  
65 (LTRs). The accumulation of mutations and recombination events during evolution made most of  
66 these elements incomplete and defective for replication. Indeed, most of HERVs in our genome  
67 are now solo LTRs (Young, Stoye, and Kassiotis 2013) resulting from recombination between 5'  
68 and 3' proviral LTRs. LTRs are critical elements that control viral gene expression either as  
69 promoters, enhancers or as polyadenylation signals. When inserted upstream, within or  
70 downstream of a “conventional” protein coding gene, LTRs can modulate its expression pattern  
71 (Cohen, Lock, and Mager 2009; Isbel and Whitelaw 2012). For example, the presence of intronic  
72 LTR can result in novel transcripts, by providing alternative promoters, enhancers or  
73 polyadenylation signals, or by altering RNA splicing (Jern and Coffin 2008; Mager et al. 1999;  
74 Dunn and Mager 2005). Very few is known about of the transcriptional modulation of such  
75 elements in pathological contexts but in cancers (like testicular cancer (J. Gimenez et al. 2010) or  
76 colorectal cancer (Pérot et al. 2015)) and auto-immune diseases (like multiple sclerosis (Laska et  
77 al. 2012; Balada, Vilardell-Tarrés, and Ordi-Ros 2010; Madeira et al. 2016)).

78 Few studies focused on HERVs reactivation in acute inflammatory contexts. In mice,  
79 modulation of HERVs expression has been shown to be quite specific, with signatures related to  
80 pathogen-associated molecular pattern (PAMPs) (Young et al. 2012). In human, LPS or PMA  
81 stimulations of myeloid cells revealed an increase expression of four HERVs families (Johnston  
82 et al. 2001). In vivo, HERVs expression has been detected in the plasma and whole blood  
83 samples of burn patients (Y.-J. Lee et al. 2013; K.-H. Lee et al. 2014) although the studies  
84 focused on whole HERVs families, not on specific loci. Studying HERV transcriptome  
85 modulation after severe inflammatory injuries could help to better understand pathological states  
86 of patients.

87 After severe injuries like septic shock, burn or trauma, leading to an important  
88 inflammatory response, we and others have shown that the blood transcriptome is highly  
89 modulated, with early and profound changes in adaptive and innate immune responses (Plassais  
90 et al. 2017; Xiao et al. 2011). Moreover in these contexts, viral reactivation is often observed,  
91 especially for Herpes Viruses (Ong et al. 2017; Textoris and Mallet 2017). This reactivation is  
92 associated with an immunosuppressive state (Walton et al. 2014). We therefore hypothesize that  
93 HERV, like latent viruses, may reactivate and be transcribed in vivo after inflammatory injuries.  
94 Given that several groups showed that some probes of commercial whole genome microarray do  
95 target HERV loci (Young, Mavrommatis, and Kassiotis 2014; Reichmann et al. 2012) (such as  
96 Affymetrix U133 plus 2), we retrospectively explored microarray datasets obtained in our lab to  
97 study the HERV transcriptome modulation in various contexts of injuries *in vivo*.

## 98 **Material and Methods**

### 99 **Patients and sample collection**

#### 100 **Microarray analyzed cohort:**

101 **Burns cohort:** 30 severe burn patients admitted at Hospices Civils de Lyon, France (HCL) were  
102 included in a placebo-controlled, randomized, double-blind study assessing the efficacy of  
103 hydrocortisone administration on burn shock duration. Inclusion / exclusion criteria, clinical  
104 description and ethical considerations of the cohort have been previously published elsewhere  
105 (Venet et al. 2015; Plassais et al. 2017). Thirteen healthy volunteers were also recruited within  
106 Hospices Civils de Lyon to serve as controls for the transcriptional study. Whole blood samples  
107 were collected at inclusion (severe shock, before any treatment, Day 1) and in the following days  
108 (around day 2 (D2), day 5 (D5) and day 7 (D7) after inclusion).

109 **Traumas cohort:** 105 patients with severe trauma were admitted at HCL. Briefly, patients were  
110 included when they were under mechanic ventilation, with an Injury Severity Score (ISS) over 25  
111 and were at least 18 years old. Inclusion / exclusion criteria and ethical considerations of the  
112 cohort have been previously published elsewhere (Gouel-Chéron et al. 2015). The main clinical  
113 variables are summarized on Table S1. Samples were collected at day 1 (D1) or day 2 (D2) after  
114 trauma. Data from 22 healthy volunteers were also used to make comparisons with patients  
115 (identical with septic shock cohort 2).

116 **Septic shock cohort 1 (SS1):** 28 septic shock patients and 25 HV admitted into 2 ICUs of HCL  
117 were included in this study to explore the early transcriptome modulation after septic shock.  
118 Inclusion / exclusion criteria, clinical description and ethical considerations of the cohort have  
119 been previously published elsewhere (Cazalis et al. 2014). The first blood sample was collected  
120 at the onset of shock (i.e., within 30 min after the beginning of vasoactive treatment, D0) and at  
121 day 1 (D1) and day 2 (D2) after shock.

122 **Septic shock cohort 2 (SS2):** 51 septic shock patients admitted to two Intensive Care Units  
123 (ICU) of HCL and 22 HV were included in a prognostic biomarker study. Inclusion / exclusion  
124 criteria, clinical description and ethical considerations of the cohort have been previously  
125 published elsewhere (Venet et al. 2017). Samples were collected at day 1 (D1), day 2 (D2) and  
126 day 3 (D3) after shock.

### 127 **RT-qPCR validation cohorts:**

128 **Patients:** Subset of cohorts used for microarray analysis were used for validation cohort: 10 burn  
129 samples at D1, 10 traumas samples at D1, 10 SS1 samples at D1, 10 SS2 samples at D1. Each  
130 subset was matched with its corresponding cohort on: Age, sex and Total Burn Surface Area  
131 (TBSA) for burns - Sex, Sepsis at D7 and Death at D28 for traumas - Age, sex and SAPS II for  
132 SS1 - Age, Sex and Death at D28 for SS2.

133 **Healthy Volunteers:** Whole blood samples were purchased from the Etablissement Français du  
134 Sang (n=12). The mean age of HV is 56, with a standard error of 9. According to the standardized  
135 procedure for blood donation, written informed consent was obtained from healthy volunteers  
136 (HVs) and personal data for blood donors were anonymized at time of blood donation and before  
137 blood transfer to a research lab.

### 138 **Flow cytometry validation cohort:**

139 **Burns:** Whole blood samples (EDTA tubes) from 13 burn patients sampled at D1 and D7 and  
140 admitted in Edouard Herriot hospital at Lyon, France were recruited as part of the EARLYBURN  
141 study (NCT02940171). Patients were aged from 21 to 84 (mean = 53), 12 men. The mean TBSA  
142 was 33% (from 20% to 52%). All samples from these patients were used for CD300LF protein  
143 analysis, and 7 of these 13 patients were used for *CD55* protein analysis.

144 **Septic shocks:** Whole blood samples (EDTA tubes) from 22 septic shock patients sampled at  
145 D1/D2, D3/D4/D5 and D6/D7/D8 after shock and admitted in Edouard Herriot hospital at Lyon,  
146 France were recruited as part of IMMUNOSEPSIS study (NCT02803346). Patients were aged  
147 from 23 to 81 (mean = 68), 16 men. Eleven samples were used for CD300LF protein analysis and  
148 11 other samples for *CD55* protein analysis.

149 **Healthy volunteers:** Whole blood samples (EDTA tubes) were purchased from the  
150 Etablissement Français du Sang (n=18). Donors were aged from 21 to 63 (mean = 50), 12 men  
151 and 6 women. They were age-matched with burn and septic shock cohorts. According to the  
152 standardized procedure for blood donation, written informed consent was obtained from healthy  
153 volunteers (HVs) and personal data for blood donors were anonymized at time of blood donation  
154 and before blood transfer to a research lab.

## 155 **RNA extraction and microarrays**

156 Total RNA was extracted with PAXgene™ Blood RNA kit (PreAnalytix, Hilden,  
157 Germany). Whole blood from PAXGene™ tubes was preferred to either buffy coat or PBMCs to  
158 ensure reproducibility and avoid missing samples within the context of a clinical study. RNA  
159 integrity was assessed using Agilent 2100 Bioanalyser (Agilent Technologies, Waldbrom,  
160 Germany) and Lab-on-chip RNA 6000 Nano Assay (Agilent Technologies). Double-stranded  
161 cDNA was prepared from total RNA and an oligo-dT primer using GeneChip One-Cycle cDNA  
162 Synthesis Kit (Affymetrix, Santa Clara, United States). Three µg labeled cRNA were hybridized  
163 onto Human Genome U133 Plus 2.0 GeneChips (Affymetrix), revealed and washed using FS450  
164 fluidic station. GeneChips were scanned using a 5G scanner (Affymetrix) and images (DAT files)  
165 were converted to CEL files using GCOS software (Affymetrix).

## 166 **Microarray analysis**

167 Microarray data are available on the Gene Expression Omnibus (GEO) website for Burn  
168 [GEO:GSE77791], SS1 [GEO:GSE57065] and SS2 [GEO:GSE95233] cohorts. The  
169 preprocessing methods were comparable in all datasets. Microarray normalization and statistical  
170 analysis were performed using R/Bioconductor (R v3.2.3). Quality assessment was performed  
171 through simpleaffy (v2.46.0) (Wilson and Miller 2005). After removing outlier samples the raw  
172 data were normalized, adjusted for background noise and summarized using the GCRMA  
173 (Guanine Cytosine Robust Multi-Array) algorithm with default parameters (Wu and Irizarry  
174 2005). COMBAT algorithm (Johnson, Li, and Rabinovic 2007) was used to remove batch effect  
175 on Burn and Trauma cohorts. The 337 probesets from the U133 Plus2.0 microarray targeting  
176 HERVs have been identified and selected as described elsewhere (Young, Mavrommatis, and  
177 Kassiotis 2014; Reichmann et al. 2012).

178 All the analysis were made with R (3.2.3). The differential expression analysis was performed  
179 with Limma package (3.26.9) (Ritchie et al. 2015). A probeset was considered significantly  
180 statistically differentially expressed between two conditions when absolute log<sub>2</sub> Fold Change was  
181 higher than 0.5 and adjusted P-values (Benjamini-Hochberg correction (Benjamini and Hochberg  
182 1995)) lower than 0.01.

## 183 **Reverse transcription and quantitative PCR:**

184 RNA from the cohorts, according to the above criteria, and new RNA from HV were  
185 selected. RNA concentration was determined using Quant-iT RNA, BR assay on Qubit (Life  
186 Technologies, Chicago, Illinois, United States). RNA integrity was assessed with the RNA 6000  
187 Nano Kit on a Bioanalyzer (Agilent Technologies, Santa Clara, California, United States).  
188 Samples with RNA integrity number  $\leq 6$  were excluded due to poor quality RNA. Total RNA  
189 was reverse transcribed in complementary DNA (200ng in a final volume of 20 µL) using  
190 QuantiTect Reverse Transcription kit (Qiagen) as recommended by the manufacturer. The  
191 expression levels of genes (*CD55*, *CD300LF*, *SLC8A1*, *NFE4*, *PTTG1IP* and *HPRT1* as reference  
192 gene) and associated HERVs were quantified using quantitative-real time polymerase chain  
193 reaction (qPCR). qPCR were performed on a LightCycler instrument using Light Cycler 480  
194 Probes Master for the genes and reference genes and on SYBR Green I master for HERVs. Final  
195 volume of 20µL contains 0.5µM of primers. For genes, an initial denaturation step of 10min at  
196 95°C followed by 45 cycles, 10 sec at 95°C, 29 sec annealing at 60°C, and 1 sec extension at

197 72°C, Taqman) was performed. For HERVs, an initial denaturation step of 5min at 95°C  
198 followed by 45 cycles of a PCR protocol ( 10 sec at 95°C, 15sec at 55°C and 15sec at 72°C,  
199 SYBR Green program), melting curve protocol was performed. The Second Derivative  
200 Maximum Method was used with the LightCycler software (Release 1.5.1) to automatically  
201 determine the crossing point for individual samples. Standard curves were generated by using  
202 serial dilutions of cDNA standards prepared from purified PCR amplicons obtained with the  
203 corresponding primers (Table S2). Relative standard curves describing the PCR efficiency of  
204 selected targets were created and used to perform efficiency-corrected quantification with the  
205 LightCycler Relative Quantification Software. Targets expression normalization was performed  
206 using a selected housekeeping gene (hypoxanthine phosphoribosyltransferase 1 [HPRT1,  
207 (Friggeri et al. 2016)]), and results were expressed as normalized concentration ratio.

## 208 **Flow cytometry**

209 **Sampling and staining:** The following antibodies were used: anti CD14-BV510, anti CD3–  
210 BV421 and anti CD56–PECy7 from BD Biosciences; anti CD300lf-PE from BD Biosciences or  
211 anti *CD55*-APC from Biolegend; anti CD16-APC from BD Biosciences or anti CD16-FITC from  
212 Beckman Coulter (Miami, FL) and PE Mouse IgG1, κ Isotype Control from BD Biosciences or  
213 APC Mouse IgG1, κ Isotype Control from R&D System. Red blood cell lysis was performed  
214 using Versalyse lysing solution (Beckman Coulter). *CD300LF* and *CD55* expression were  
215 measured using Navios flow cytometer (Beckman-Coulter). Results were analyzed with Kaluza  
216 software (Beckman-Coulter) expressed as Medians of Fluorescence Intensity (MFI).

## 217 **Statistics**

218 Wilcoxon signed rank tests were done for RT-qPCR and flow cytometry results, by comparison  
219 between HV and each cohort of patients, for each target.

## 220 **Ethics approval and consent to participate**

221 EDTA blood tubes were obtained from EFS (Etablissement Français du Sang) and used  
222 immediately. In accordance with EFS standardized procedures for blood donation, written no-  
223 objection was obtained from healthy volunteers to use the blood for the research and personal  
224 data for blood donors were anonymized before blood transfer to our research lab.  
225 Protocols of the discovery and validation cohorts were approved by local ethics committees.  
226 Non-opposition to inclusion in the protocols was systematically recorded from patients or next of  
227 kin.

228

## 229 **Results**

230 We studied the *in vivo* modulation of the HERV transcriptome in three clinical relevant  
231 models of acute inflammatory injury: a burn, a trauma and 2 septic shock cohorts. We analyzed  
232 expression from each cohort independently comparing patients with healthy volunteers. All  
233 cohorts included severely injured patients (Table 1). The 30 burn patients had a median total burn  
234 surface area (TBSA) of 70% and high severity scores (median Baux: 110, median Abbreviated  
235 Burn Severity Index (ABSI): 11). The 105 trauma patients had a median Injury Severity Score

236 (ISS) score of 34 and a median Simplified Acute Physiology Score II (SAPSII) of 44. The 28  
237 septic shocks from SS1 cohort had a median SAPSII of 45 and a median Charlson score of 2. The  
238 51 patients from SS2 cohort had a median SAPSII of 51.

239 As previously published (Young, Mavrommatis, and Kassiotis 2014; Reichmann et al.  
240 2012), we extracted data from 337 probesets targeting HERVs loci from the whole genome U133  
241 plus 2.0 microarray datasets. Among them, a majority had low expression levels, within  
242 background levels (Figure 1). Based on hierarchical clustering analysis, 64 probesets (19%) were  
243 expressed (i.e. above background) for burns, 60 probesets (18%) for traumas, 164 for septic  
244 shock 1 (49%) and 63 for septic shocks 2 (19%). The 25% most variant probesets (n=84) across  
245 samples in each dataset revealed that several probesets were even highly expressed (Figure 2). In  
246 each dataset, the hierarchical clustering highlighted a clear difference between patients and HV,  
247 suggesting a modulation of HERV expression following injury. Interestingly, over these top 25%  
248 most variant probesets selected in each dataset (resulting of 127 distinct probesets), 44 (35%)  
249 were similarly modulated in the four datasets, and 102 (80%) in at least 2 datasets (Figure 3). In  
250 order to analyze the HERV transcriptome modulation associated with injury, we performed a  
251 supervised analysis comparing HERV expression in injured patients at D1 (admission) and HV,  
252 in each dataset separately. The comparison (accounting for multiple testing correction with  
253 absolute fold change higher than 1 and corrected p-value lower than 0.01) between burn patients  
254 and HV resulted in 19 differentially expressed HERVs (Figure 4A). The comparison between  
255 trauma patients and HV resulted in 27 differentially expressed HERVs (Figure 4B). The  
256 comparison between septic shock patients and HV resulted in 19 and 46 differentially expressed  
257 HERVs for cohorts 1 and 2 respectively (Figure 4C and D). Altogether, 56 different probesets  
258 targeting HERVs were differentially expressed among all 4 datasets, clearly discriminating HV  
259 from patients at ICU admission (Figure 5, Table S3). Taking into account the global profile for  
260 each probeset, 16 (28.6%) had higher expression in patients compared to HV and 40 (71.4%)  
261 were down-modulated in patients. Interestingly, 5 probesets were differentially expressed in all 4  
262 datasets and 16 in at least 3 of them (Figure 6A). All 5 commonly modulated probesets had  
263 consistent expression profile across the 4 datasets. Four were over-expressed in patients  
264 compared to healthy volunteers (Figure 6B). The 5<sup>th</sup> probeset, down-modulated in all datasets,  
265 maps at multiple locations in the genome and was not considered in further analyses. Among the  
266 4 remaining modulated probesets, 1 HERV from ERV24B\_Prim-int family (236982\_at), is within  
267 2kb from the *PTTG1IP* gene and 3 are within a gene. A HERV from LTR33 family (230354\_at)  
268 is within an intron of *SLC8A1* gene. A HERV from MLT1H family (1556107\_at) and one from  
269 LTR16B2 family (1559777\_at) are located in the 3'UTR of *CD55* and *MIR3945HG* genes  
270 respectively (Table 2).

271 Moreover, we selected 2 other probesets of interest, 1553043\_a\_at and 1560527\_at (Figure 6C).  
272 The first one targets a MLT1D HERV located in the 3'UTR of *CD300LF*. It was up-modulated in  
273 burn and SS2 cohorts. It had a strong up-modulation at D1 in burn patients compared to HV,  
274 decreasing over the first week towards HV expression level at D7. The second one targets a  
275 LTR101\_Mam HERV located in a 3'UTR of a processed transcripts of *NFE4* gene. It was  
276 differentially expressed in the 2 septic shock cohorts. This probeset had the highest log2FC  
277 among the 5 septic shock-specific modulated probesets.

278 To validate these transcriptional HERV modulations, we designed primers on the 6  
279 described HERV loci above and on nearby genes by RT-qPCR (Table S2). For each targeted  
280 region, we made multiple RT-qPCR designs. We identified several distinct patterns of expression

281 comparing HERVs and nearby genes: (i) for *PTTG1IP* and *MIR3945HG* regions, we observed no  
282 or low signal from the HERV loci (data not shown), (ii) for *SLC8A1* (Figure 7) and *NFE4*  
283 (Figure 8) regions, we observed a high signal from HERVs elements, but no or lower signal on  
284 the genes, (iii) for *CD55* (Figure 9) and *CD300LF* (Figure 10) regions, we observed a middle or  
285 high signal from both HERV loci and genes.

286 To better interpret the results, we extracted from Ensembl the genome annotation and  
287 showed in genomic context, the microarray and the RT-qPCR results of *SLC8A1* (Figure 7),  
288 *NFE4* (Figure 8), *CD55* (Figure 9) and *CD300LF* (Figure 10) regions. *SLC8A1* has 11 known  
289 transcripts. All but one are located in 3' of the LTR33 HERV element targeted by the 230354\_at  
290 probeset, which is located in the first intron of *SLC8A1-204* transcript (Figure 7A). The up-  
291 modulation of the LTR33 element in septic shock patients observed on microarray was confirmed  
292 by RT-qPCR (Figure 7B, Figure 7C). The up-modulation observed for other cohorts was not  
293 confirmed by RT-qPCR. The gene *SLC8A1* was not expressed in patients or HV, as seen on  
294 various microarray probesets and confirmed by RT-qPCR (*SLC8A1\_gene*, var210, var211\_212).

295 *NFE4* gene has 2 transcripts (Figure 8A) and only one is coding for a protein (*NFE4-202*).  
296 The LTR101\_Mam HERV element, targeted by the 2560527\_at probeset, is located in 3'UTR of  
297 *NFE4-201*, the non-protein-coding transcript. Although the same trends are observed between  
298 microarray and RT-qPCR, the up-modulation of the LTR101\_Mam element observed in septic  
299 shock patients with microarray was not statistically significant in RT-qPCR, (Figure 8B, Figure  
300 8C). There was low or no signal on designs targeting gene transcripts (*NFE4\_gene* and  
301 *NFE4\_gene\_var201*).

302 *CD55* gene has 11 transcripts. The MLT1H HERV element, targeted by the 1556107\_at  
303 probeset, is located in the 3'UTR of *CD55-211* transcript (Figure 9A). The HERV element  
304 overlaps the 3'UTR of transcript *CD55-211* and a long intergenic noncoding RNA (lincRNA, a  
305 class of long transcribed RNA molecules longer than 200 nucleotides and not coding for proteins)  
306 (Figure 9B). The up-modulation of MLT1H saw with microarray in the 4 cohorts was partially  
307 confirmed with RT-qPCR on trauma and septic shock cohorts (Figure 9C, Figure 9D). The  
308 designs targeting MLT1H or close neighborhood (PCR3, 4 and 5) presented the same profile,  
309 with a significant difference in septic shock and trauma cohorts compared to HV (PCR4). The  
310 design targeting the gene showed also up-modulation of *CD55* and a very high absolute  
311 normalized expression in patients compared to HV (Figure 9D). (Of note 1555950\_a\_at probeset,  
312 targeting most of *CD55* transcripts, was also up-modulated in patients, and with a high  
313 expression level (data not shown)). We also confirmed by flow cytometry on monocytes and  
314 neutrophils that *CD55* expression was higher in patients than in HV, confirming an up-  
315 modulation at the protein level in patients (Figure 9E).

316 The MLT1D HERV element, targeted by the 1553043\_a\_at probeset is located in 3'UTR  
317 of *CD300LF-201*, *202*, *203*, *204* and *207* protein-coding transcripts (Figure 10A). We made  
318 several RT-qPCR designs, targeting either the HERV locus only (PCR1) or both HERV and  
319 3'UTR of *CD300LF* (PCR2, Figure 10B). The up-modulation seen in burns and septic shock 2  
320 cohorts on microarray was not confirmed by RT-qPCR, neither for gene nor for HERV designs  
321 (Figure 10D). PCR1 showed no signal at all. PCR2 design showed a slight higher expression  
322 level in burn and septic shock cohorts compared to HV. We also confirmed an higher expression  
323 at the protein level by flow cytometry on neutrophils in burn and septic shock patients, compared  
324 to HV (Figure 10E). In monocytes, protein level in burn at D1 seemed slightly higher than HV.



## 325 Discussion

326 We took advantage of previous microarray analyses on four cohorts of severely injured  
327 patients to assess the modulation of HERV transcriptome in acute inflammation. We showed that  
328 several loci were expressed and modulated after acute injury. Surprisingly, a large majority  
329 among the modulated HERVs were down-modulated in patients compared to HV, whereas a  
330 global and massive gene up-modulation has been observed after severe injuries (Xiao et al.  
331 2011).

332 Five HERVs were modulated in patients compared to HV in all four datasets and 16  
333 HERVs in at least 3 datasets, suggesting a similar inflammatory triggered modulation in all  
334 models. We validated expression profiles by RT-qPCR on 6 regions, allowing us to explore more  
335 precisely the modulation pattern of the HERVs and the neighbor genes. Interestingly, all these 6  
336 HERVs have detected signals in RNAseq experiments from lymphoid cells and whole blood  
337 datasets (Ensembl Rnaseq tracks, (Aken et al. 2017)). Some authors already focused on HERV  
338 detection in blood of burn patients using pan-family RT-PCRs (Y.-J. Lee et al. 2013; K.-H. Lee et  
339 al. 2014). However, very few data are available in human diseases for specific loci. No study had  
340 yet evaluated the expression of HERVs in acute inflammatory contexts by using multiple cohorts  
341 with different types of inflammatory injuries.

342 Several groups showed that huge epigenetic modifications occur after acute inflammation,  
343 regulating transcriptional profiles in the immune system, especially in sepsis (J. L. G. Gimenez et  
344 al. 2016; Saeed et al. 2014). These epigenetic modifications may explain the polarization profiles  
345 such as tolerance or trained immunity, observed after various stimulations of innate cells (Saeed  
346 et al. 2014). We hypothesized and confirmed *in vivo* that other elements than genes, especially  
347 HERVs which are known to be tightly controlled by epigenetic modifications (Daskalakis et al.  
348 2018), might be modulated in acute inflammatory situations. This has also been demonstrated in  
349 other pathophysiological contexts such as cancer (J. Gimenez et al. 2010; Pérot et al. 2015;  
350 Lamprecht et al. 2010; Beyer et al. 2016), where global epigenetic modifications are also  
351 observed (Chiappinelli et al. 2015; Groh and Schotta 2017).

352 Interestingly in cancer, epigenetic modifications that gave access to HERV cis sequences  
353 through open chromatin, have also revealed a very role in pathophysiology (Lamprecht et al.  
354 2010; Cohen, Lock, and Mager 2009; Mager et al. 1999). Indeed, by providing alternative  
355 promoter sequences to classical protein coding genes, these epigenetic modifications explain part  
356 of the ectopic expression of myeloid-growth factor receptors in lymphoid cells (Lamprecht et al.  
357 2010). This underlines how HERV elements, in particular their LTRs, could modulate gene  
358 expression and the host immune response to injury. In our study, the four commonly modulated  
359 HERVs were LTRs located nearby genes related to the immune response. In several cases  
360 (*NFE4*, *CD300LF*), we found a polyadenylation signal (AAUAAA) provided by the HERV LTR  
361 in 3' of some of the alternative transcripts of the genes. The case of *CD300LF* is interesting as  
362 this protein acts as an inhibitory receptor for myeloid cells (Alvarez-Errico et al. 2004). The LTR  
363 might stabilize specific transcripts and enhance expression of CD300LF protein, which we  
364 confirmed by flow cytometry in severe burn patients early after admission. This up regulation  
365 might participate in the compensatory anti-inflammatory response. The precise understanding of  
366 the mechanisms through which specific HERV LTRs might impact immune gene expression is  
367 not possible in such translational research setting with patient samples. This will require in the  
368 future *in vitro* experimental models to validate and understand our observations.

369 Our RT-qPCR validation assays also showed inter-individual variability and underlined  
370 that exploring such repertoire of our genome, repetitive sequences, may face specificity issues,  
371 and will require specific tools. Indeed, as a first attempt, we used commercial microarray where  
372 probesets were not initially designed to target HERV elements. Moreover, as the probesets  
373 targeting HERVs were initially supposed to target conventional genes, the majority of explored  
374 HERVs are close to or within a gene. To better understand HERV expression in these settings,  
375 targeting HERVs localized far from genes seems important. Until now, the lack of tool made  
376 difficult the exploration of HERV expression. It would be interesting to reproduce these analyses,  
377 with a more exhaustive technology designed to specifically target HERVs, like the HERV-V3  
378 Affymetrix microarray we recently published (Becker et al. 2017), or even RNAseq. It will allow  
379 us to better describe the whole HERV transcriptome modulation and understand the putative  
380 global role of HERV in the host response.

381 Finally, it would be of importance to take into account HERV expression in further blood  
382 transcriptome analyses, especially in such acute inflammatory contexts, to better understand  
383 HERV expression during host response. HERVs could be good markers of the different phases  
384 after important inflammatory shocks and could even become potential therapeutic targets if their  
385 functional role on host-response is confirmed.

386 To conclude, we showed for the first time that specific HERV loci are transcribed in whole blood  
387 of ICU patients. Our design allowed us to identify specific transcriptional signatures of HERVs  
388 elements, *in vivo*, linked to the acute inflammatory response. Moreover, the similarities observed  
389 in three models of acute injuries suggest common regulatory mechanisms and a specificity of the  
390 observed modulation. We also unravel the potential regulatory role of these elements within the  
391 host immune response. Further studies are needed to better understand such mechanisms and how  
392 HERVs may contribute to the pathophysiology of the host immune response, a key part of the  
393 pathophysiology of sepsis.

394  
395 **List of abbreviations**  
396 HERV: Human endogenous retrovirus; LTR: Long Terminal Repeats; PAMP: pathogen-  
397 associated molecular pattern; LPS: Lipopolysaccharide; PMA: phorbol-12-myristate-13-acetate;  
398 HV: healthy volunteers; ICU: Intensive Care Unit; TBSA: Total Burn Surface Area; ABSI:  
399 Abbreviated Burn Severity Index; ISS: Injury Severity Score; SAPSII: Simplified Acute  
400 Physiology Score II; MFI: Medians of Fluorescence Intensity;

401  
402 **Acknowledgements**  
403 The authors would like to gratefully thank Maria-Paola Pisano, Marie-Angélique Cazalis, Boris  
404 Meunier, Julie Mouillaux and Estelle Peronnet for their kind advices. They also thank all clinical  
405 research assistant for the collection of blood samples, especially Hélène Vallin and Valérie Cerro.  
406 Finally they gratefully thank Anne Portier and Marie-Angélique Cazalis for all experiments made  
407 on samples.

408

## 409 **Author Contributions Statement**

410 OT and JT designed the project, performed the analyses and wrote the paper. CJ and FV  
411 performed cytometry experiments. EC performed RT-qPCR validations. ML, AC, BA, TR  
412 recruited patients in the various cohorts. OT, MM, FV, FM, JT read and discussed the  
413 manuscript. All authors drafted or revised critically the manuscript for important intellectual  
414 contents. All authors read and approved the final manuscript.

## 415 **Conflict of Interest Statement**

416 OT, MM, CJ, EC, AP, FM and JT are employees of an *in-vitro* diagnostic company. The other  
417 authors declare that the research was conducted in the absence of any commercial or financial  
418 relationships that could be construed as a potential conflict of interest.

## 419 **Funding**

420 This work was supported by bioMérieux SA and HCL. MM and OT were supported by doctoral  
421 grants from bioMérieux. In addition, OT was supported by the Association Nationale de la  
422 Recherche et de la Technologie (ANRT), convention N° 2015/1227.

## 423 **Data availability statement**

424 Microarray expression data has been deposited on NCBI Gene Expression Omnibus and are  
425 accessible through GEO accession numbers GEO:GSE77791, GEO:GSE57065 and  
426 GEO:GSE95233. Data from microarray experiment for trauma cohort are available at Hospices  
427 Civils de Lyon – bioMérieux – UCBL1 “Pathophysiology of Injury Induced  
428 Immunosuppression”, Groupement Hospitalier Edouard Herriot, France.  
429

## 430 **References**

- 431 Aken, Bronwen L., Premanand Achuthan, Wasiu Akanni, M. Ridwan Amode, Friederike  
432 Bernsdorff, Jyothish Bhai, Konstantinos Billis, et al. 2017. “Ensembl 2017.” *Nucleic Acids*  
433 *Research* 45 (D1): D635–42. <https://doi.org/10.1093/nar/gkw1104>.
- 434 Alvarez-Errico, Damiana, Helena Aguilar, Friederike Kitzig, Tamara Brckalo, Joan Sayós,  
435 and Miguel López-Botet. 2004. “IREM-1 Is a Novel Inhibitory Receptor Expressed by Myeloid  
436 Cells.” *European Journal of Immunology* 34 (12): 3690–3701.  
437 <https://doi.org/10.1002/eji.200425433>.
- 438 Balada, Eva, Miquel Vilardell-Tarrés, and Josep Ordi-Ros. 2010. “Implication of Human  
439 Endogenous Retroviruses in the Development of Autoimmune Diseases.” *International*  
440 *Reviews of Immunology* 29 (4): 351–70. <https://doi.org/10.3109/08830185.2010.485333>.
- 441 Becker, Jérémie, Philippe Pérot, Valérie Cheynet, Guy Oriol, Nathalie Mugnier, Marine  
442 Mommert, Olivier Tabone, Julien Textoris, Jean-Baptiste Veyrieras, and François Mallet.  
443 2017. “A Comprehensive Hybridization Model Allows Whole HERV Transcriptome Profiling

- 444 Using High Density Microarray." *BMC Genomics* 18 (1): 286.  
445 <https://doi.org/10.1186/s12864-017-3669-7>.
- 446 Benjamini, Yoav, and Yosef Hochberg. 1995. "Controlling the False Discovery Rate: A  
447 Practical and Powerful Approach to Multiple Testing." *Journal of the Royal Statistical Society. Series B (Methodological)* 57 (1): 289–300.  
448
- 449 Beyer, U., S. K. Krönung, A. Leha, L. Walter, and M. Dobbstein. 2016. "Comprehensive  
450 Identification of Genes Driven by ERV9-LTRs Reveals TNFRSF10B as a Re-Activatable  
451 Mediator of Testicular Cancer Cell Death." *Cell Death & Differentiation* 23 (1): 64–75.  
452 <https://doi.org/10.1038/cdd.2015.68>.
- 453 Cazalis, Marie-Angélique, Alain Lepape, Fabienne Venet, Florence Frager, Bruno Mougin,  
454 Hélène Vallin, Malick Paye, Alexandre Pachot, and Guillaume Monneret. 2014. "Early and  
455 Dynamic Changes in Gene Expression in Septic Shock Patients: A Genome-Wide Approach."  
456 *Intensive Care Medicine Experimental* 2 (1): 20. [https://doi.org/10.1186/s40635-014-0020-](https://doi.org/10.1186/s40635-014-0020-3)  
457 3.
- 458 Chiappinelli, Katherine B., Pamela L. Strissel, Alexis Desrichard, Huili Li, Christine Henke,  
459 Benjamin Akman, Alexander Hein, et al. 2015. "Inhibiting DNA Methylation Causes an  
460 Interferon Response in Cancer via DsRNA Including Endogenous Retroviruses." *Cell* 162 (5):  
461 974–86. <https://doi.org/10.1016/j.cell.2015.07.011>.
- 462 Cohen, Carla J., Wynne M. Lock, and Dixie L. Mager. 2009. "Endogenous Retroviral LTRs as  
463 Promoters for Human Genes: A Critical Assessment." *Gene, Genomic Impact of Eukaryotic  
464 Transposable Elements*, 448 (2): 105–14. <https://doi.org/10.1016/j.gene.2009.06.020>.
- 465 Daskalakis, Michael, David Brocks, Yi-Hua Sheng, Md Saiful Islam, Alzbeta Ressenrova,  
466 Yassen Assenov, Till Milde, et al. 2018. "Reactivation of Endogenous Retroviral Elements via  
467 Treatment with DNMT- and HDAC-Inhibitors." *Cell Cycle* 0 (0): 1–12.  
468 <https://doi.org/10.1080/15384101.2018.1442623>.
- 469 Dunn, Catherine A, and Dixie L Mager. 2005. "Transcription of the Human and Rodent  
470 SPAM1 / PH-20 Genes Initiates within an Ancient Endogenous Retrovirus." *BMC Genomics* 6  
471 (April): 47. <https://doi.org/10.1186/1471-2164-6-47>.
- 472 Friggeri, Arnaud, Marie-Angélique Cazalis, Alexandre Pachot, Martin Cour, Laurent Argaud,  
473 Bernard Allaouchiche, Bernard Floccard, et al. 2016. "Decreased CX3CR1 Messenger RNA  
474 Expression Is an Independent Molecular Biomarker of Early and Late Mortality in Critically  
475 Ill Patients." *Critical Care* 20: 204. <https://doi.org/10.1186/s13054-016-1362-x>.
- 476 Gimenez, Jose Luis Garcia, Nieves Eburne Carbonell, Carlos Roma Mateo, Eva Garcia López,  
477 Lorena Palacios, Lorena Peiro Chova, Ester Berenguer, Carla Giménez Garzo, Federico V.  
478 Pallardó, and Jose Blanquer. 2016. "Epigenetics As The Driving Force In Long-Term  
479 Immunosuppression." *Journal of Clinical Epigenetics* 2 (2). [https://doi.org/10.21767/2472-](https://doi.org/10.21767/2472-1158.100017)  
480 1158.100017.
- 481 Gimenez, Juliette, Cécile Montgiraud, Jean-Philippe Pichon, Bertrand Bonnaud, Maud Arzac,  
482 Karine Ruel, Olivier Bouton, and François Mallet. 2010. "Custom Human Endogenous  
483 Retroviruses Dedicated Microarray Identifies Self-Induced HERV-W Family Elements

- 484 Reactivated in Testicular Cancer upon Methylation Control." *Nucleic Acids Research* 38 (7):  
485 2229–46. <https://doi.org/10.1093/nar/gkp1214>.
- 486 Gouel-Chéron, Aurélie, Bernard Allaouchiche, Bernard Floccard, Thomas Rimmelé, and  
487 Guillaume Monneret. 2015. "Early Daily MHLA-DR Monitoring Predicts Forthcoming Sepsis  
488 in Severe Trauma Patients." *Intensive Care Medicine* 41 (12): 2229–30.  
489 <https://doi.org/10.1007/s00134-015-4045-1>.
- 490 Groh, Sophia, and Gunnar Schotta. 2017. "Silencing of Endogenous Retroviruses by  
491 Heterochromatin." *Cellular and Molecular Life Sciences*, February, 1–11.  
492 <https://doi.org/10.1007/s00018-017-2454-8>.
- 493 Isbel, Luke, and Emma Whitelaw. 2012. "Endogenous Retroviruses in Mammals: An  
494 Emerging Picture of How ERVs Modify Expression of Adjacent Genes." *BioEssays: News and  
495 Reviews in Molecular, Cellular and Developmental Biology* 34 (9): 734–38.  
496 <https://doi.org/10.1002/bies.201200056>.
- 497 Jern, Patric, and John M. Coffin. 2008. "Effects of Retroviruses on Host Genome Function."  
498 *Annual Review of Genetics* 42 (1): 709–32.  
499 <https://doi.org/10.1146/annurev.genet.42.110807.091501>.
- 500 Johnson, W. Evan, Cheng Li, and Ariel Rabinovic. 2007. "Adjusting Batch Effects in  
501 Microarray Expression Data Using Empirical Bayes Methods." *Biostatistics (Oxford, England)*  
502 8 (1): 118–27. <https://doi.org/10.1093/biostatistics/kxj037>.
- 503 Johnston, J. B., C. Silva, J. Holden, K. G. Warren, A. W. Clark, and C. Power. 2001. "Monocyte  
504 Activation and Differentiation Augment Human Endogenous Retrovirus Expression:  
505 Implications for Inflammatory Brain Diseases." *Annals of Neurology* 50 (4): 434–42.
- 506 Lamprecht, Björn, Korden Walter, Stephan Kreher, Raman Kumar, Michael Hummel, Dido  
507 Lenze, Karl Köchert, et al. 2010. "Derepression of an Endogenous Long Terminal Repeat  
508 Activates the CSF1R Proto-Oncogene in Human Lymphoma." *Nature Medicine* 16 (5): 571–  
509 79. <https://doi.org/10.1038/nm.2129>.
- 510 Laska, Magdalena Janina, Tomasz Brudek, Kari Konstantin Nissen, Tove Christensen, Anné  
511 Møller-Larsen, Thor Petersen, and Bjørn Andersen Nexø. 2012. "Expression of HERV-Fc1, a  
512 Human Endogenous Retrovirus, Is Increased in Patients with Active Multiple Sclerosis."  
513 *Journal of Virology* 86 (7): 3713–22. <https://doi.org/10.1128/JVI.06723-11>.
- 514 Lee, Kang-Hoon, HyungChul Rah, Tajia Green, Young-Kwan Lee, Debora Lim, Jean Nemzek,  
515 Wendy Wahl, David Greenhalgh, and Kiho Cho. 2014. "Divergent and Dynamic Activity of  
516 Endogenous Retroviruses in Burn Patients and Their Inflammatory Potential." *Experimental  
517 and Molecular Pathology* 96 (2): 178–87. <https://doi.org/10.1016/j.yexmp.2014.02.001>.
- 518 Lee, Yun-Jung, Byung-Hoon Jeong, Jae-Bong Park, Hyung-Joo Kwon, Yong-Sun Kim, and In-  
519 Suk Kwak. 2013. "The Prevalence of Human Endogenous Retroviruses in the Plasma of  
520 Major Burn Patients." *Burns* 39 (6): 1200–1205.  
521 <https://doi.org/10.1016/j.burns.2012.12.013>.
- 522 Madeira, Alexandra, Ingrid Burgelin, Hervé Perron, Francois Curtin, Alois B. Lang, and  
523 Raphael Faucard. 2016. "MSRV Envelope Protein Is a Potent, Endogenous and Pathogenic  
524 Agonist of Human Toll-like Receptor 4: Relevance of GNbAC1 in Multiple Sclerosis

- 525 Treatment." *Journal of Neuroimmunology* 291 (February): 29–38.  
526 <https://doi.org/10.1016/j.jneuroim.2015.12.006>.
- 527 Mager, D. L., D. G. Hunter, M. Schertzer, and J. D. Freeman. 1999. "Endogenous Retroviruses  
528 Provide the Primary Polyadenylation Signal for Two New Human Genes (HHLA2 and  
529 HHLA3)." *Genomics* 59 (3): 255–63. <https://doi.org/10.1006/geno.1999.5877>.
- 530 Ong, David S. Y., Marc J. M. Bonten, Cristian Spitoni, Verduyn Lunel, Frans M, Jos F. Frencken,  
531 Janneke Horn, et al. 2017. "Epidemiology of Multiple Herpes Viremia in Previously  
532 Immunocompetent Patients With Septic Shock." *Clinical Infectious Diseases* 64 (9): 1204–10.  
533 <https://doi.org/10.1093/cid/cix120>.
- 534 Pérot, Philippe, Christina Susanne Mullins, Magali Naville, Cédric Bressan, Maja Hühns,  
535 Michael Gock, Florian Kühn, et al. 2015. "Expression of Young HERV-H Loci in the Course of  
536 Colorectal Carcinoma and Correlation with Molecular Subtypes." *Oncotarget* 6 (37): 40095–  
537 111.
- 538 Plassais, Jonathan, Fabienne Venet, Marie-Angélique Cazalis, Diane Le Quang, Alexandre  
539 Pachot, Guillaume Monneret, Sylvie Tissot, and Julien Textoris. 2017. "Transcriptome  
540 Modulation by Hydrocortisone in Severe Burn Shock: Ancillary Analysis of a Prospective  
541 Randomized Trial." *Critical Care* 21 (1): 158. <https://doi.org/10.1186/s13054-017-1743-9>.
- 542 Reichmann, Judith, James H. Crichton, Monika J. Madej, Mary Taggart, Philippe Gautier, Jose  
543 Luis Garcia-Perez, Richard R. Meehan, and Ian R. Adams. 2012. "Microarray Analysis of LTR  
544 Retrotransposon Silencing Identifies Hdac1 as a Regulator of Retrotransposon Expression  
545 in Mouse Embryonic Stem Cells." *PLoS Comput Biol* 8 (4): e1002486.  
546 <https://doi.org/10.1371/journal.pcbi.1002486>.
- 547 Ritchie, Matthew E., Belinda Phipson, Di Wu, Yifang Hu, Charity W. Law, Wei Shi, and  
548 Gordon K. Smyth. 2015. "Limma Powers Differential Expression Analyses for RNA-  
549 Sequencing and Microarray Studies." *Nucleic Acids Research* 43 (7): e47.  
550 <https://doi.org/10.1093/nar/gkv007>.
- 551 Saeed, Sadia, Jessica Quintin, Hindrik H. D. Kerstens, Nagesha A. Rao, Ali Aghajani-refah,  
552 Filomena Matarese, Shih-Chin Cheng, et al. 2014. "Epigenetic Programming of Monocyte-to-  
553 Macrophage Differentiation and Trained Innate Immunity." *Science* 345 (6204): 1251086.  
554 <https://doi.org/10.1126/science.1251086>.
- 555 Textoris, Julien, and François Mallet. 2017. "Immunosuppression and Herpes Viral  
556 Reactivation in Intensive Care Unit Patients: One Size Does Not Fit All." *Critical Care* 21  
557 (August): 230. <https://doi.org/10.1186/s13054-017-1803-1>.
- 558 Venet, Fabienne, Jonathan Plassais, Julien Textoris, Marie-Angélique Cazalis, Alexandre  
559 Pachot, Marc Bertin-Maghit, Christophe Magnin, Thomas Rimmelé, Guillaume Monneret,  
560 and Sylvie Tissot. 2015. "Low-Dose Hydrocortisone Reduces Norepinephrine Duration in  
561 Severe Burn Patients: A Randomized Clinical Trial." *Critical Care (London, England)* 19: 21.  
562 <https://doi.org/10.1186/s13054-015-0740-0>.
- 563 Venet, Fabienne, Jeremy Schilling, Marie-Angélique Cazalis, Julie Demaret, Fanny Poujol,  
564 Thibaut Girardot, Christelle Rouget, et al. 2017. "Modulation of LILRB2 Protein and MRNA

- 565 Expressions in Septic Shock Patients and after Ex Vivo Lipopolysaccharide Stimulation.”  
566 *Human Immunology*, March. <https://doi.org/10.1016/j.humimm.2017.03.010>.
- 567 Walton, Andrew H., Jared T. Muenzer, David Rasche, Jonathan S. Boomer, Bryan Sato,  
568 Bernard H. Brownstein, Alexandre Pachot, et al. 2014. “Reactivation of Multiple Viruses in  
569 Patients with Sepsis.” *PLoS ONE* 9 (6): e98819.  
570 <https://doi.org/10.1371/journal.pone.0098819>.
- 571 Wilson, Claire L., and Crispin J. Miller. 2005. “Simpleaffy: A BioConductor Package for  
572 Affymetrix Quality Control and Data Analysis.” *Bioinformatics (Oxford, England)* 21 (18):  
573 3683–85. <https://doi.org/10.1093/bioinformatics/bti605>.
- 574 Wu, Zhijin, and Rafael A. Irizarry. 2005. “Stochastic Models Inspired by Hybridization  
575 Theory for Short Oligonucleotide Arrays.” *Journal of Computational Biology: A Journal of*  
576 *Computational Molecular Cell Biology* 12 (6): 882–93.  
577 <https://doi.org/10.1089/cmb.2005.12.882>.
- 578 Xiao, Wenzhong, Michael N. Mindrinos, Junhee Seok, Joseph Cuschieri, Alex G. Cuenca, Hong  
579 Gao, Douglas L. Hayden, et al. 2011. “A Genomic Storm in Critically Injured Humans.” *Journal*  
580 *of Experimental Medicine* 208 (13): 2581–90. <https://doi.org/10.1084/jem.20111354>.
- 581 Young, George R., Urszula Eksmond, Rosalba Salcedo, Lena Alexopoulou, Jonathan P. Stoye,  
582 and George Kassiotis. 2012. “Resurrection of Endogenous Retroviruses in Antibody-  
583 Deficient Mice.” *Nature* 491 (7426): 774–78. <https://doi.org/10.1038/nature11599>.
- 584 Young, George R, Bettina Mavrommatis, and George Kassiotis. 2014. “Microarray Analysis  
585 Reveals Global Modulation of Endogenous Retroelement Transcription by Microbes.”  
586 *Retrovirology* 11 (1): 59. <https://doi.org/10.1186/1742-4690-11-59>.
- 587 Young, George R, Jonathan P Stoye, and George Kassiotis. 2013. “Are Human Endogenous  
588 Retroviruses Pathogenic? An Approach to Testing the Hypothesis.” *Bioessays* 35 (9): 794–  
589 803. <https://doi.org/10.1002/bies.201300049>.

590

## 591 **Figure Legends**

592 **Figure 1: Heatmap representation of HERVs in three models of injury.** Heatmap of the 337  
593 probesets targeting HERVs in the four datasets: burn, trauma and 2 septic shock cohorts.  
594 Probesets are in rows and samples in columns. Samples are annotated (colored bars on the top) by  
595 type of samples ( HV in pink, patients in cyan) and day after inclusion (blue scaled). Expression  
596 levels are color-coded from blue (low expression) to red (high expression). Similar patterns of  
597 expression are highlighted through hierarchical clustering of probesets (rows) with Euclidean  
598 distance and complete clustering method. **(A)** Expression levels in burns. **(B)** Expression levels in  
599 traumas. **(C)** Expression levels in septic shock 1. **(D)** Expression levels in septic shock 2. On each  
600 heatmap, the percentage of probesets with low intensity is shown.

601 **Figure 2: Heatmap representation of HERVs in three models of injury.** Heatmap of the 25%  
602 most variant probesets targeting HERVs in the four datasets: burn, trauma and 2 septic shock  
603 cohorts. Probesets are in rows and samples in columns. Samples are annotated (colored bars on  
604 the top) by type of samples ( HV in pink, patients in cyan) and day after inclusion (blue scaled).

605 Expression levels are color-coded from blue (low expression) to red (high expression). Similar  
606 patterns of expression are highlighted through hierarchical clustering of probesets (rows) and  
607 samples (columns) with Euclidean distance and complete clustering method. **(A)** Expression  
608 levels in burn patients. **(B)** Expression levels in trauma patients. **(C)** Expression levels in septic  
609 shock 1 patients. **(D)** Expression levels in septic shock 2 patients.

610 **Figure 3: Most variant HERVs in severely injured patients.** Venn diagram of the 84 most  
611 variant HERV probesets (25%) selected in each of the four datasets.

612 **Figure 4: Volcano plots of differentially expressed HERVs.** **(A)** in burn cohort. **(B)** in trauma  
613 cohort. **(C)** in septic shock cohort 1 and **(D)** in septic shock cohort 2. The x-axis represents the  
614 log<sub>2</sub> fold change between patient and HV, the y-axis the  $-\log_{10}$  of adjusted p-values. Each point  
615 represents a probeset targeting HERV, in red the statistically differentially expressed between  
616 patients at D1 and HV. On each volcano plot, the number indicates the number of differentially  
617 expressed probesets.

618 **Figure 5: Heatmap representation of the modulated HERVs in severely injured patients at**  
619 **D1.** Heatmap of the 56 differentially expressed probesets in at least 1 dataset. On the top bar,  
620 samples are color-coded in blue for HV and in red for Patients. On the bar below, samples are in  
621 green for Burn study, in yellow for Trauma study, in purple for Septic Shock 1 (SS1) study and in  
622 light red for Septic Shock 2 (SS2). Probesets are in rows and samples in columns. Expression  
623 levels from each cohort have been normalized (centered and reduced). Normalized expression  
624 levels are color-coded from blue (low expression) to red (high expression). Similar patterns of  
625 expression are highlighted through hierarchical clustering of probesets (rows) and samples  
626 (columns) with Euclidean distance and complete clustering method.

627 **Figure 6: Differentially expressed HERVs in severely injured patients.** **(A)** Venn diagram of  
628 differentially expressed HERVs for each dataset. **(B)** Expression profiles of commonly  
629 modulated probesets targeting HERVs in the 4 datasets. Boxes are color-coded by day after  
630 inclusion. **(C)** Expression profiles of 2 selected probesets targeting HERVs. For each graphic  
631 from top to bottom, title contains: probeset name, HERV name and closest gene.

632 **Figure 7: LTR33 HERV and SLC8A1 gene expression.** **(A)** *SLC8A1* genomic region, with the  
633 position of HERV in green, probeset in dark blue and PCR designs in purple. **(B)** Expression  
634 levels of the HERV loci from microarray, in HV and patients at D1. **(C)** Expression levels of  
635 specific transcripts by RT-qPCR, as described in A, in HV and patients at D1. Expression levels  
636 (copy number /  $\mu$ l) were normalized with reference gene (*HPRT1*). Boxes are color-coded by  
637 cohort. Statistically significant difference with HV is marked by \* (Wilcoxon signed rank test, p-  
638 value <0.05).

639 **Figure 8 : LTR101\_Mam HERV and NFE4 gene expression.** **(A)** *NFE4* genomic region, with  
640 the position of HERV in green, of probeset in dark blue, of PCR designs in purple. **(B)**  
641 Expression levels of the HERV loci from microarray, in HV and patients at D1. **(C)** Expression  
642 levels of specific transcripts by RT-qPCR, as described in A, in HV and patients at D1.  
643 Expression levels (copy number /  $\mu$ l) were normalized with reference gene (*HPRT1*). Boxes are  
644 color-coded by cohort. Statistically significant difference with HV is marked by \* (Wilcoxon  
645 signed rank test, p-value <0.05).



646 **Figure 9: CD55 associated HERV.** (A) *CD55* genomic region, with the positions of HERV in  
 647 green, of probeset in dark blue, of PCR designs in purple. (B) Zoom in genomic region of HERV  
 648 showing PCR designs in detail. (C) Expression levels of the HERV loci from microarray, in HV  
 649 and patients at D1. (D) Expression levels of specific transcripts by RT-qPCR, as described in A  
 650 and B, in HV and patients at D1. Expression levels (copy number /  $\mu$ l) were normalized with  
 651 reference gene (*HPRT1*). Boxes are color-coded by cohort. (E) Protein expression levels (MFI),  
 652 on monocytes (left) and neutrophils (right) from 8 burn patients (red), 11 septic shock patients  
 653 (blue) and 9 HV (purple). Columns ISO B, ISO SS and ISO HV correspond to isotypes for burn,  
 654 septic shock and HV respectively. Statistically significant difference with HV is marked by \*  
 655 (Wilcoxon signed rank test, p-value <0.05).

656 **Figure 10: CD300LF associated HERV.** (A) *CD300LF* genomic region, with the positions of  
 657 HERV in green, of probeset in dark blue, of PCR designs in purple. (B) Zoom in genomic region  
 658 of HERV showing PCR designs in detail. (C) Expression levels of the HERV loci from  
 659 microarray, in HV and patients at D1. (D) Expression levels of specific transcripts by RT-qPCR,  
 660 as described in A and B, in HV and patients at D1. Expression levels (copy number /  $\mu$ l) were  
 661 normalized with reference gene (*HPRT1*). Boxes are color-coded by cohort. (E) Protein  
 662 expression levels (MFI), on monocytes (left) and neutrophils (right) from 14 burn patients (red),  
 663 11 septic shock patients (blue) and 10 HV (purple). Columns ISO B, ISO SS and ISO HV  
 664 correspond to isotypes for burn, septic shock and HV respectively. Statistically significant  
 665 difference with HV is marked by \* (Wilcoxon signed rank test, p-value <0.05)

666

## 667 Tables

668

669 **Table 1: Patients characteristics of burn, trauma and septic shock cohorts included in**  
 670 **microarray analyses.** TBSA: Total Burn Surface Area; ISS: Injury Severity Score; ABSI:  
 671 Abbreviated Burn Severity Index; SAPSII: Simplified Acute Physiology Score II.

| Variable             | Burn<br>(n=30) | Trauma<br>(n=105) | Septic shock 1<br>(n=28) | Septic shock 2<br>(n=51) |
|----------------------|----------------|-------------------|--------------------------|--------------------------|
| Age, years           | 48 [39-55]     | 38 [25-54]        | 62 [54-76]               | 65 [53-74]               |
| Gender, women, n (%) | 8 (27%)        | 34 (32%)          | 9 (32%)                  | 18 (35%)                 |
| Weight, kg           | 94 [77-104]    | 78 [67-92]        | -                        | -                        |
| TBSA (%)             | 70 [48-84]     | -                 | -                        | -                        |
| Baux score           | 110 [102-125]  | -                 | -                        | -                        |
| ABSI score           | 11 [10-12]     | -                 | -                        | -                        |
| ISS                  | -              | 34 [29-41]        | -                        | -                        |
| SOFA score           | -              | 5 [1-7]           | 10 [9-13]                | 10 [8-12]                |
| SAPSII               | -              | 44 [29-56]        | 45 [34-56]               | 51 [43-62]               |

|                          |            |          |           |          |
|--------------------------|------------|----------|-----------|----------|
| Secondary septic shock   | 12 (40%)   | 29 (28%) | -         | -        |
| ICU length of stay, days | 66 [22-89] | 9 [5-17] | 10 [5-14] | -        |
| Mortality at D28, n (%)  | 8 (27%)    | 4 (4%)   | 5 (18%)   | 17 (33%) |

672

673 **Table2: Characteristics of the 6 probesets of interest.**

| Probeset                                         | 1556107_at            | 1559777_at            | 230354_at           | 236982_at            | 1553043_a_at         | 1560527_at            |
|--------------------------------------------------|-----------------------|-----------------------|---------------------|----------------------|----------------------|-----------------------|
| <b>Patients compared to HVs</b>                  | UP                    | UP                    | UP                  | UP                   | UP (for Burn & SS2)  | UP (for SS1 & SS2)    |
| <b>log2FC in</b>                                 |                       |                       |                     |                      |                      |                       |
| <i>Burn</i>                                      | 1.13                  | 1.05                  | 1.73                | 0.77                 | 1.48                 | -0.55                 |
| <i>Trauma</i>                                    | 1.31                  | 0.79                  | 1.47                | 1.57                 | -0.33                | 1.50                  |
| <i>SSI</i>                                       | 0.57                  | 1.07                  | 2.03                | 0.90                 | 0.26                 | 0.72                  |
| <i>SS2</i>                                       | 1.45                  | 1.26                  | 2.97                | 1.12                 | 1.08                 | 2.00                  |
| <b>HERV family</b>                               | MLT1H                 | LTR16B2               | LTR33               | ERV24B_Prim-int      | MLT1D                | LTR101_Mam            |
| <b>Genomic coordinates of HERV element</b>       | 1:207372720-207272854 | 4:184844993-184845324 | 2:40545338-40545778 | 21:44875454-44876122 | 17:74694268-74694744 | 7:102988743-102988923 |
| <b>Closest gene to the element</b>               | CD55                  | MIR3945HG             | SLC8A1              | PTTG1IP              | CD300LF              | NFE4                  |
| <b>Localization compared to the closest gene</b> | 3' UTR                | 3' UTR                | intron 1            | promoter region      | 3'UTR                | 3'end                 |

674

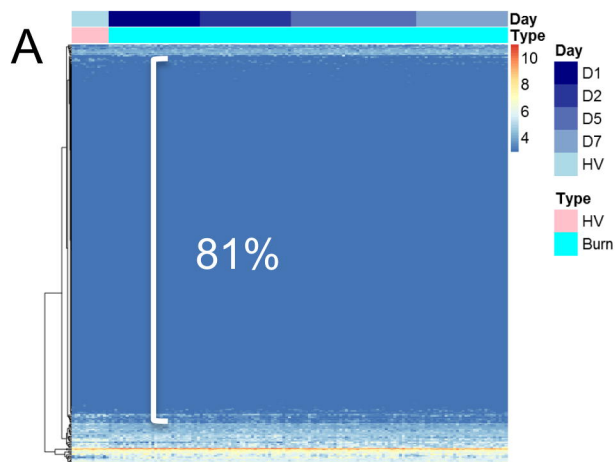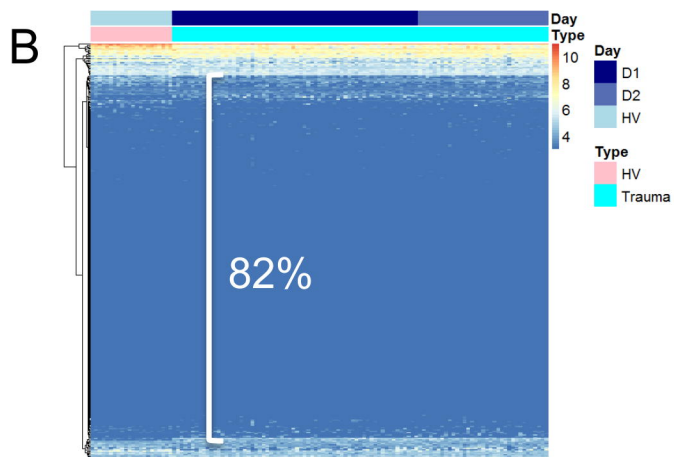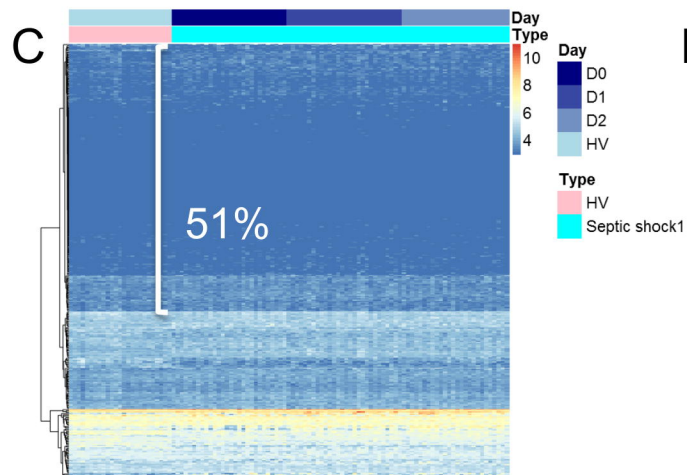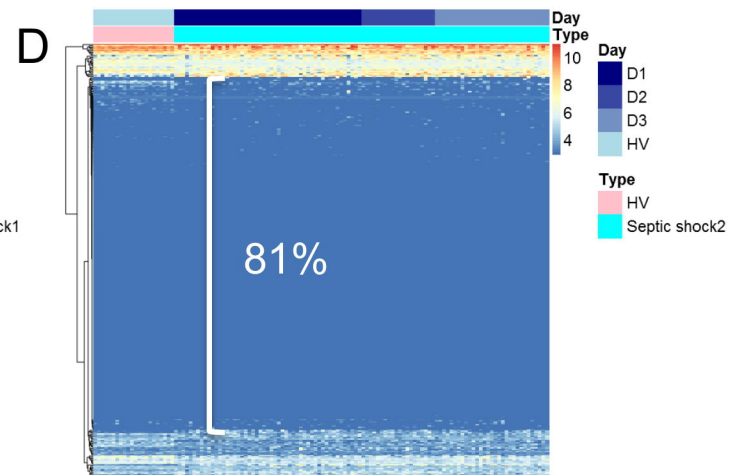

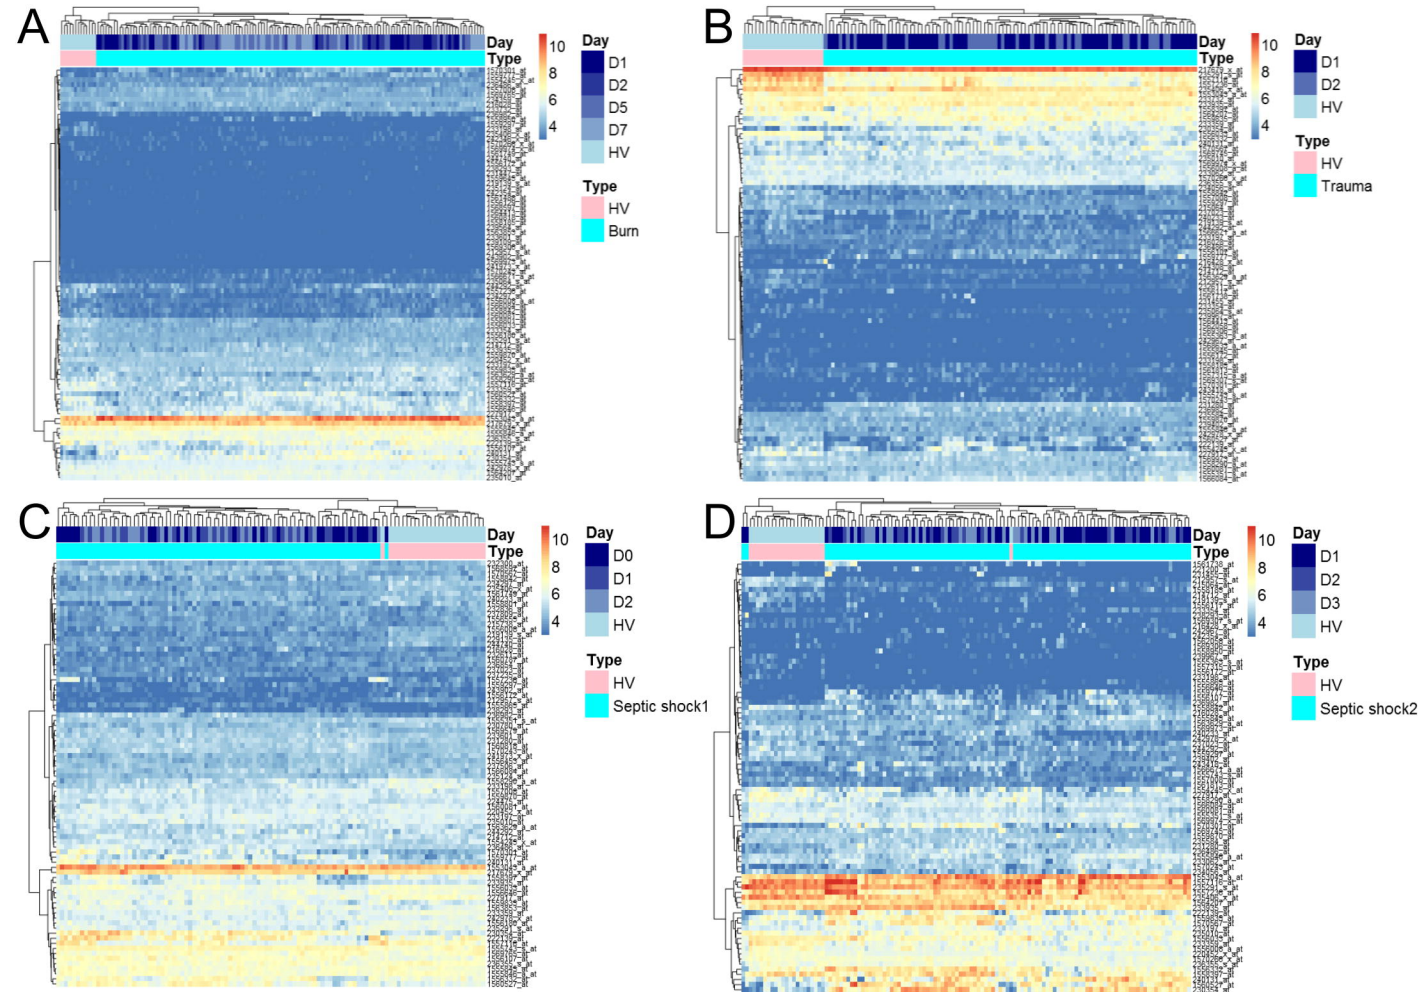

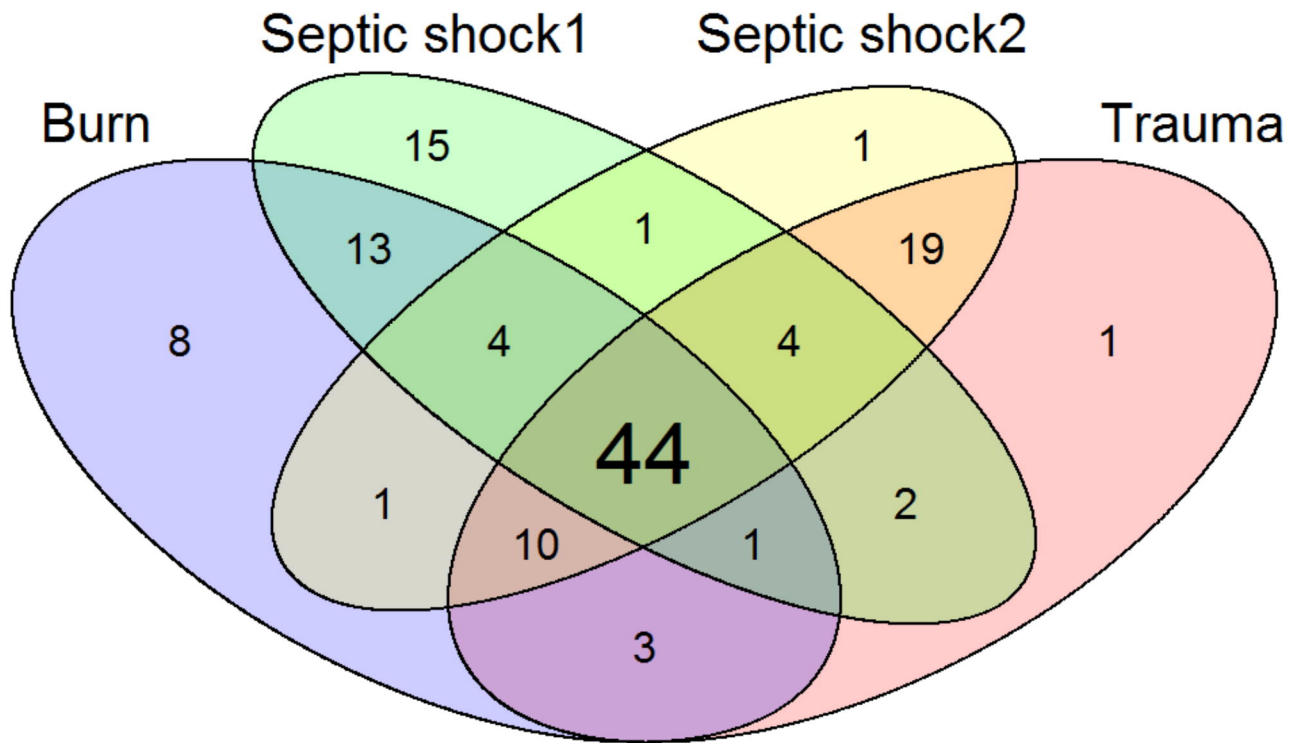

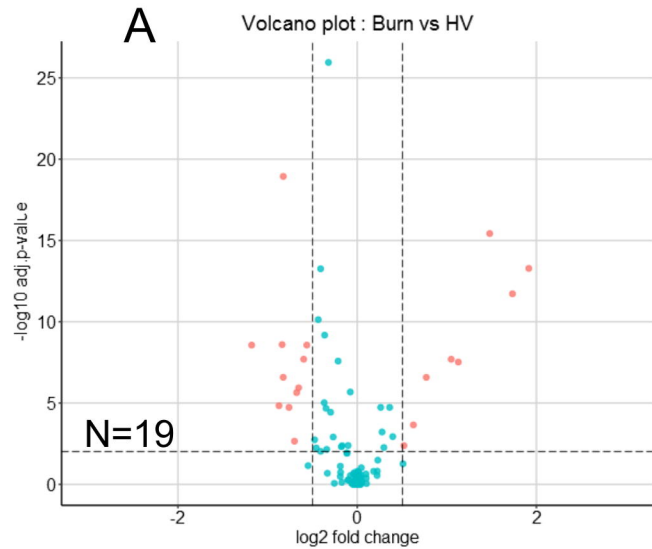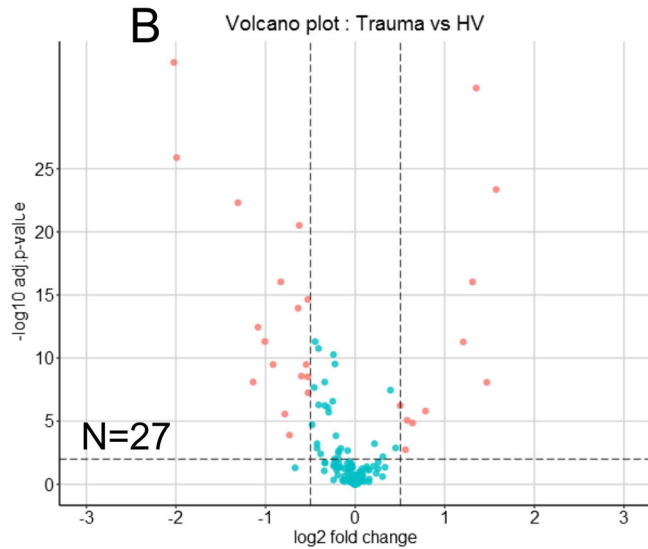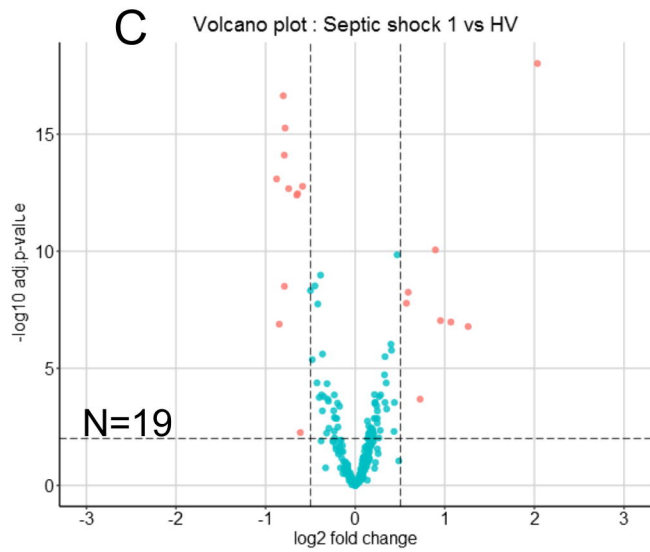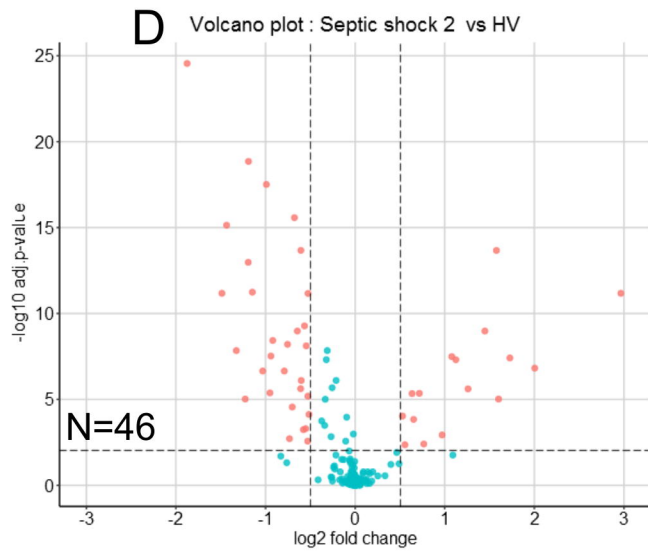

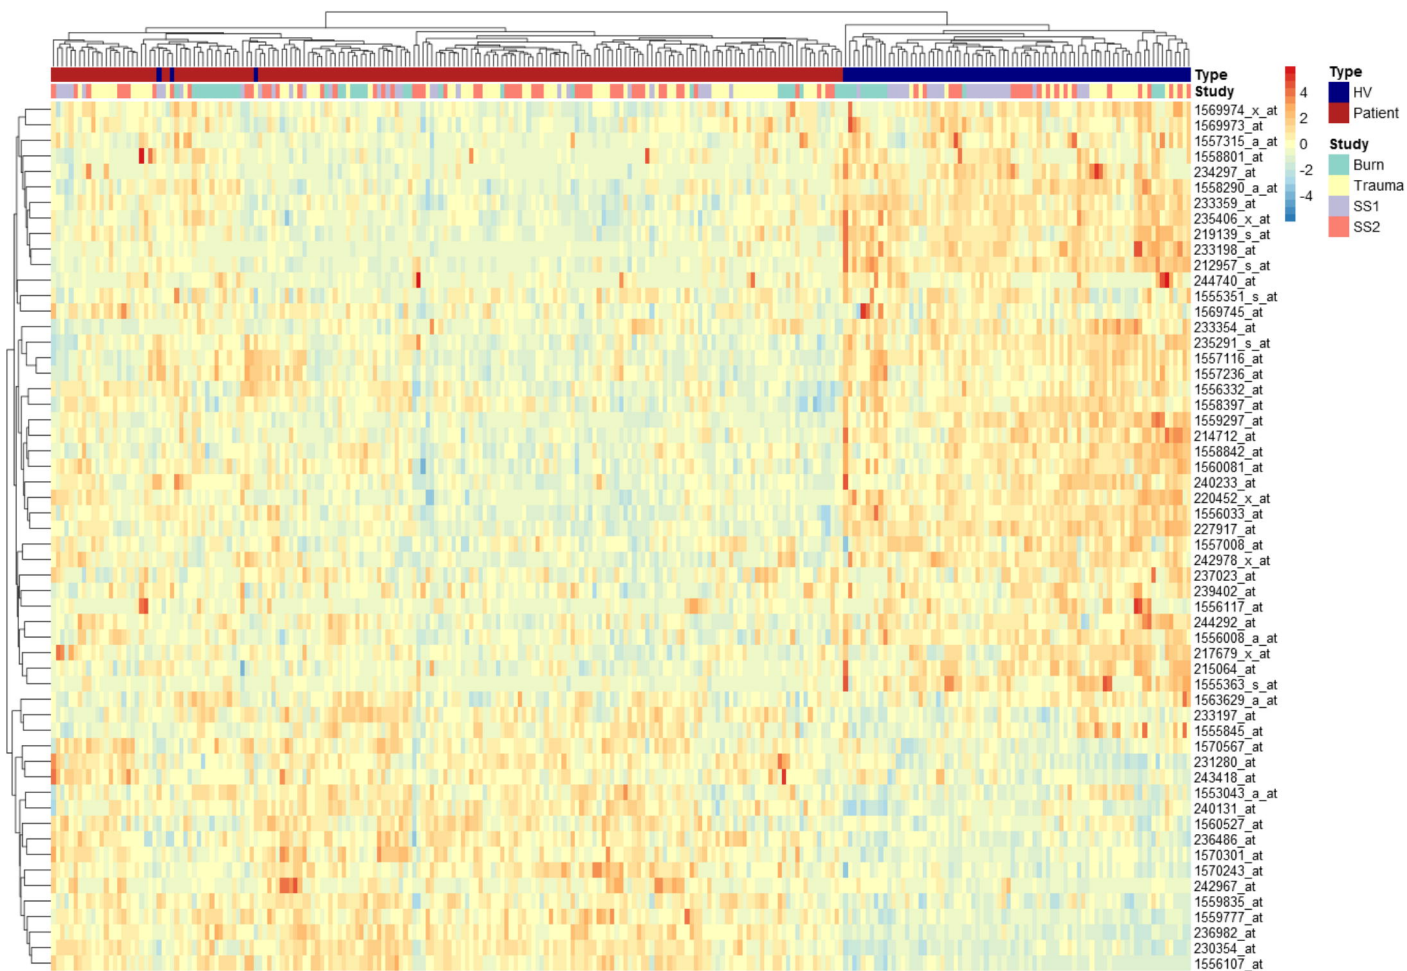

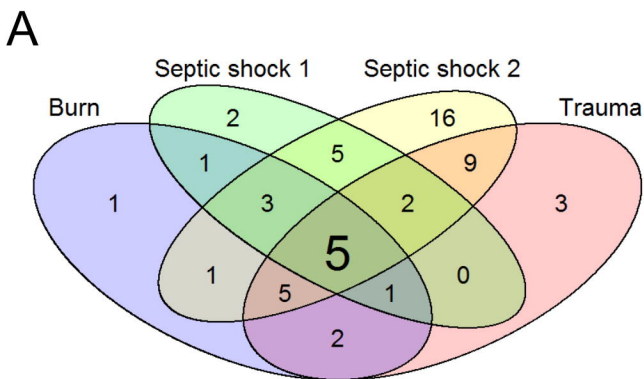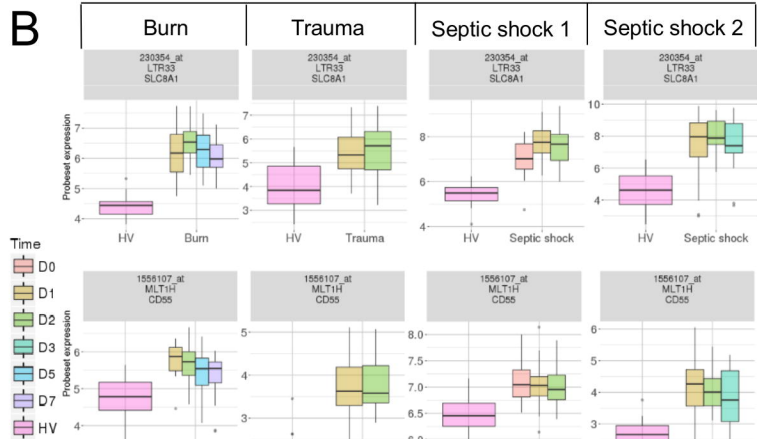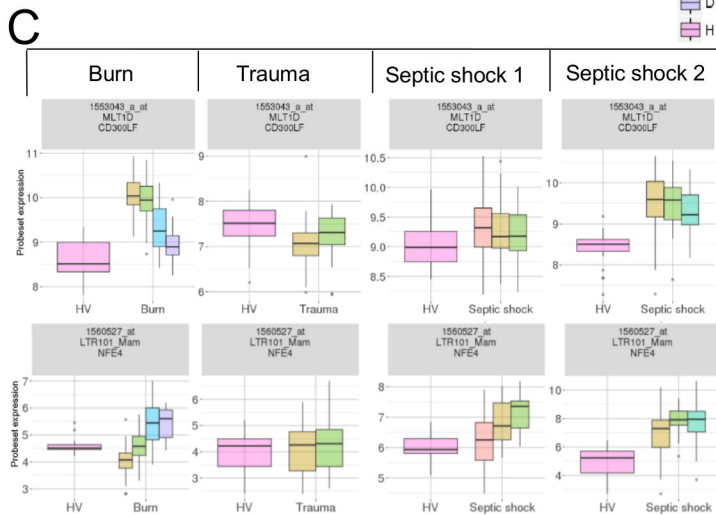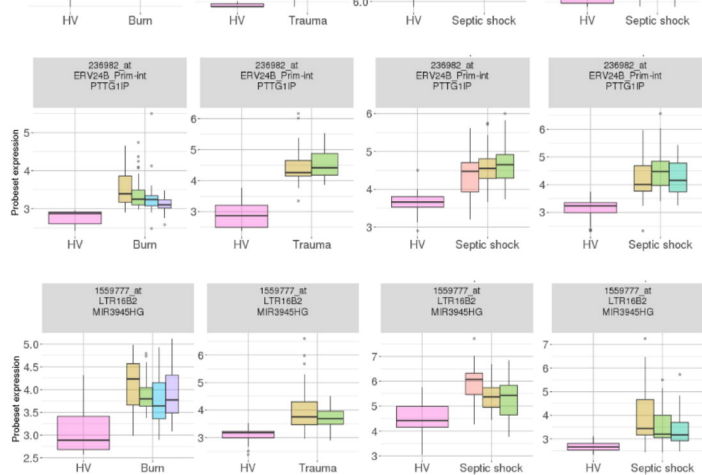



# A SLC8A1 genomic region

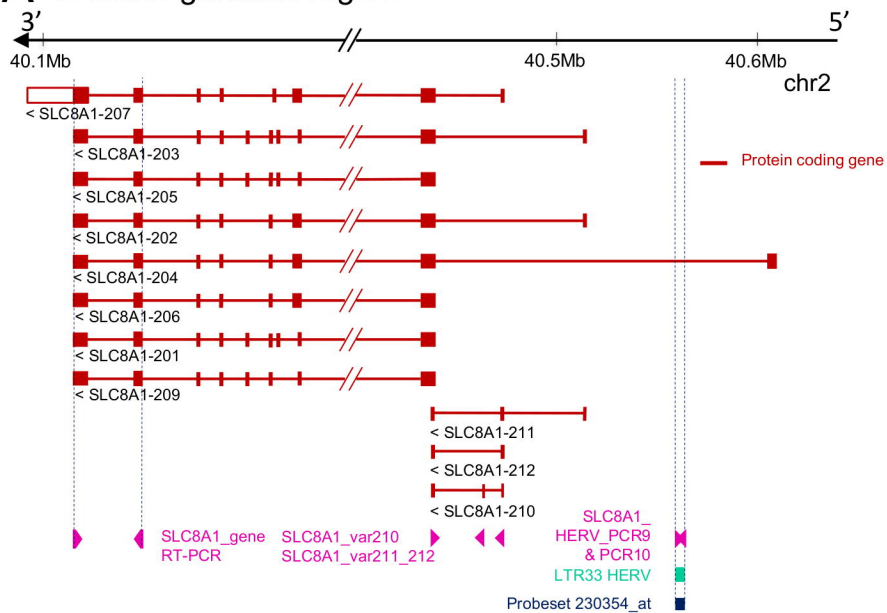

# B Microarray results

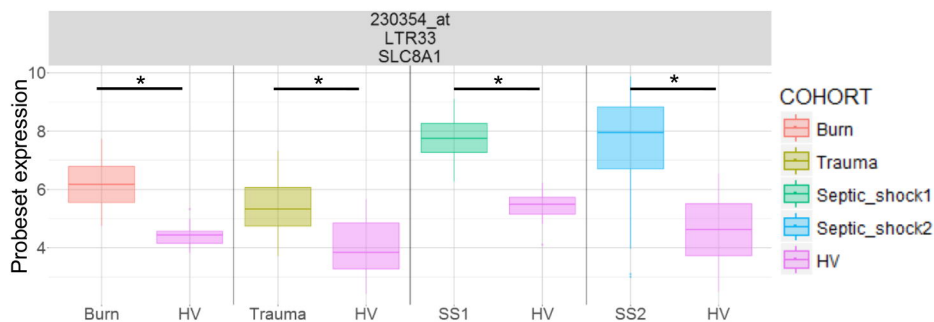

# C RTqPCR results

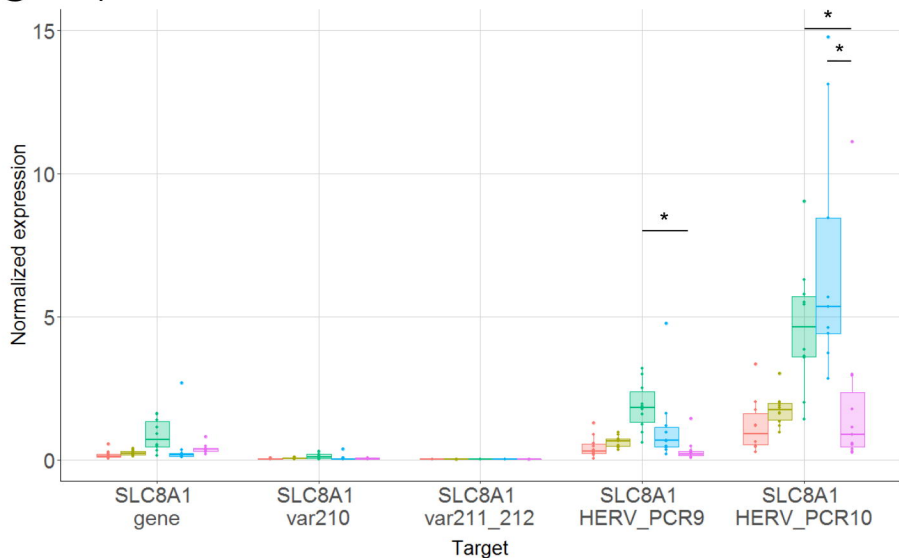

# A NFE4 genomic region

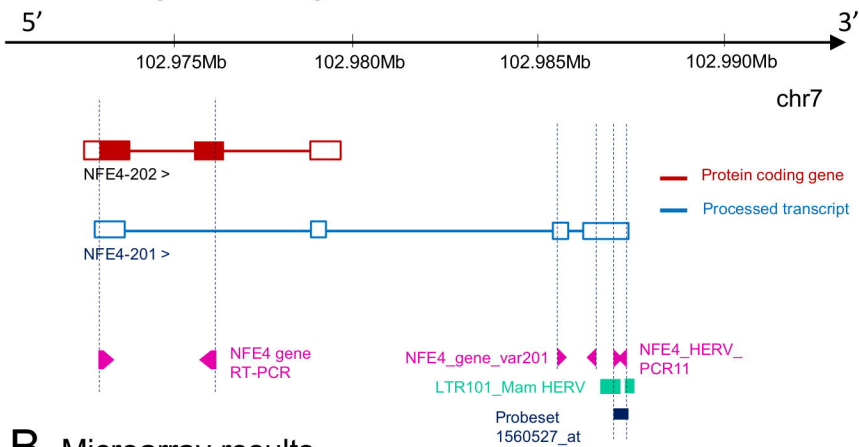

# B Microarray results

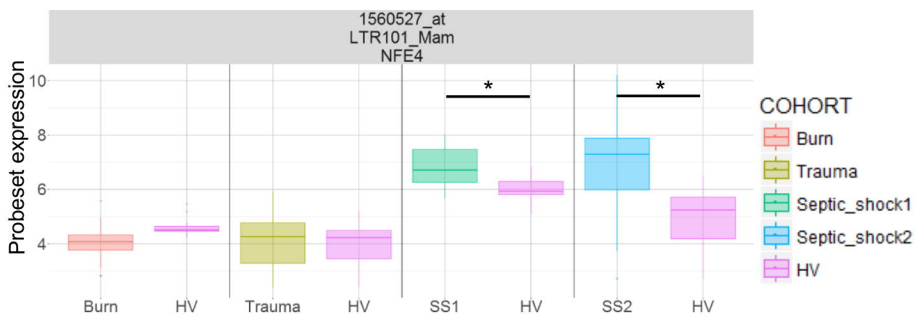

# C RTqPCR results

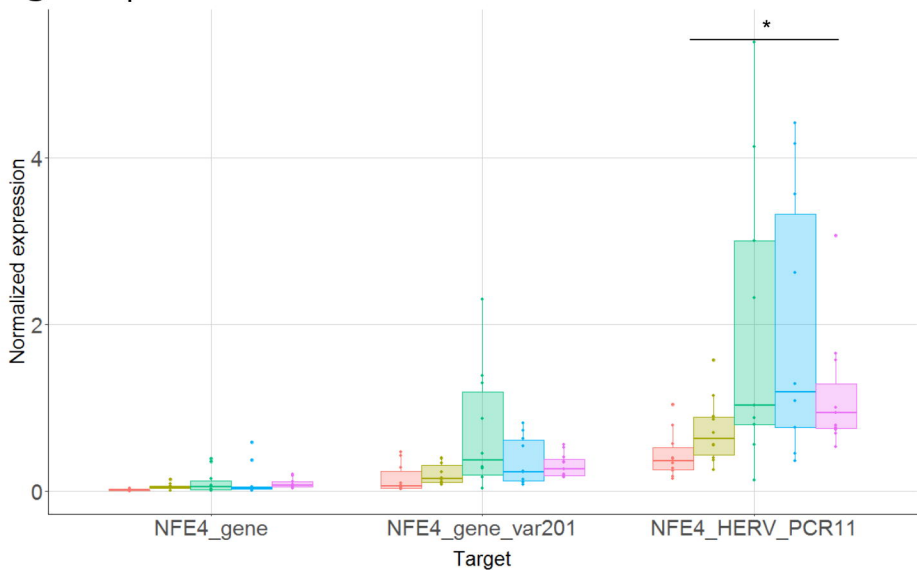

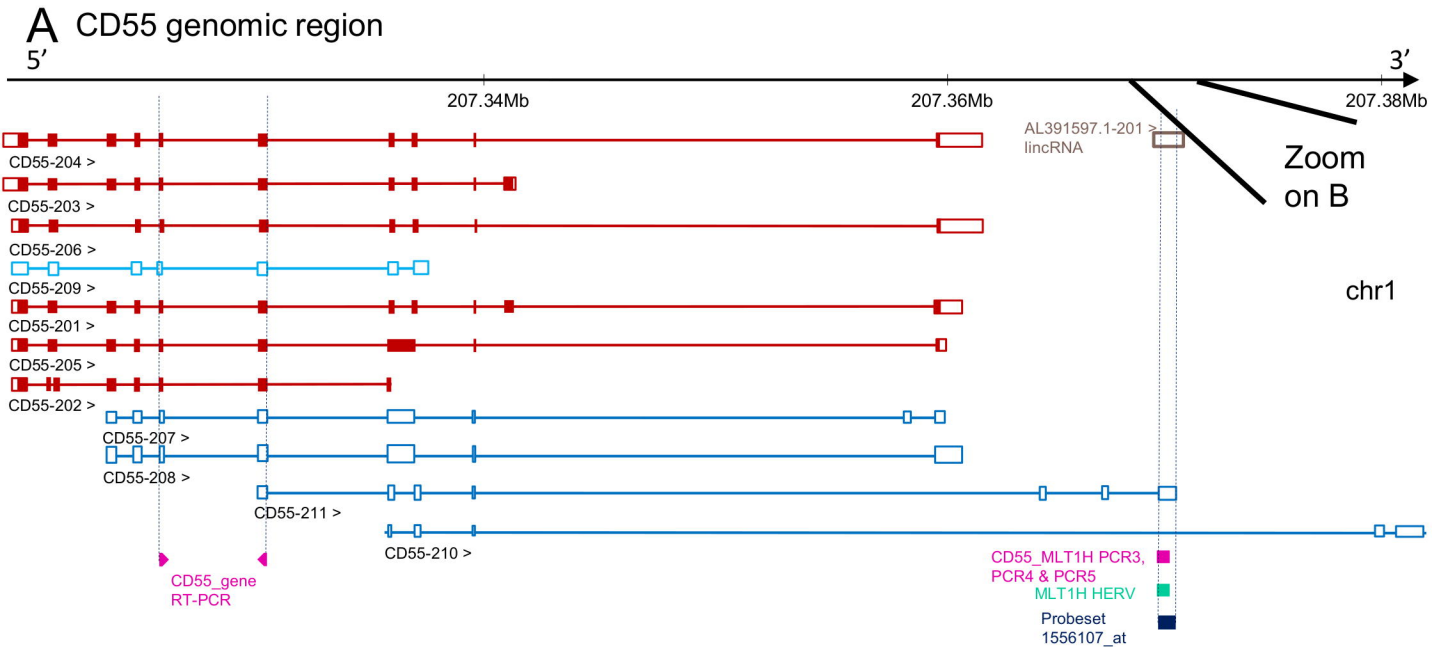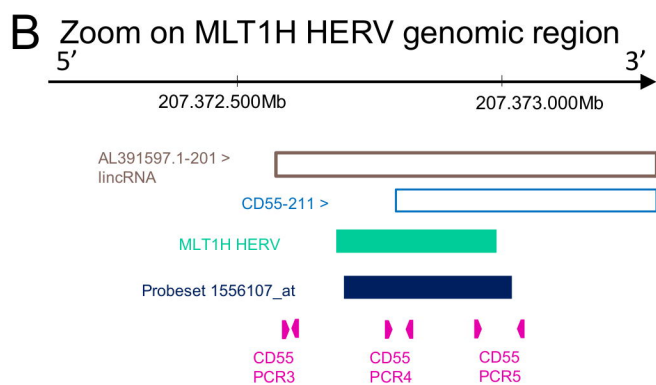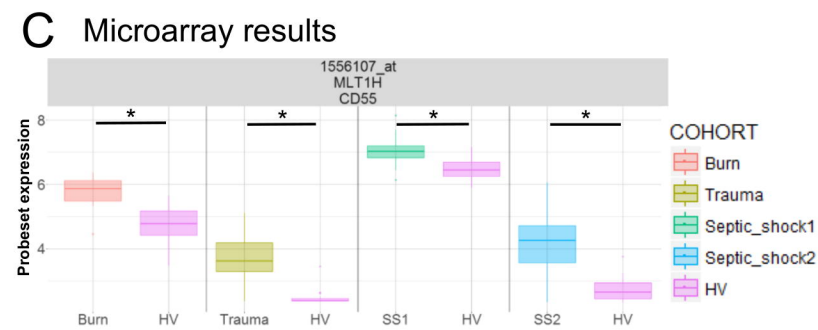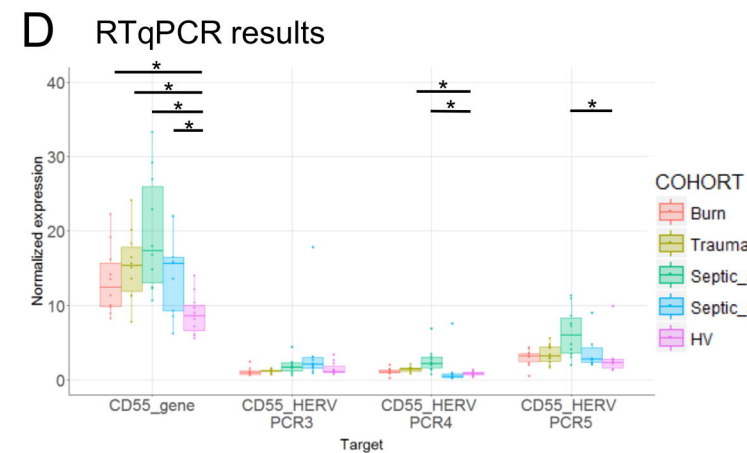

### E Cytometry results

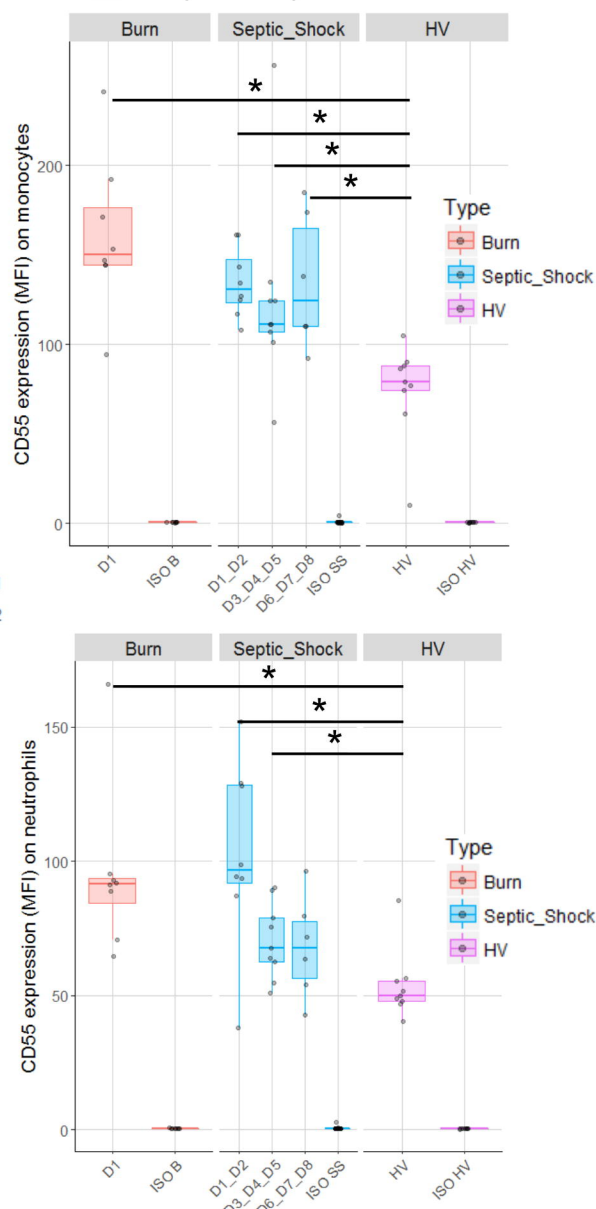

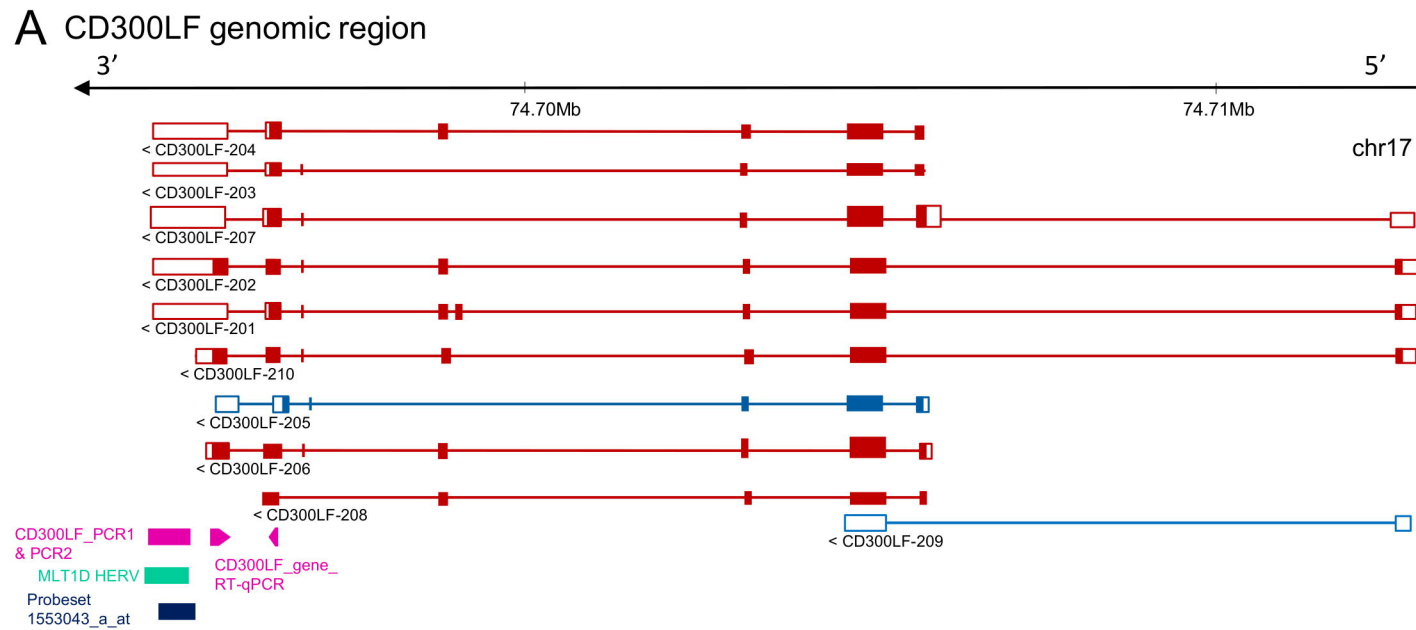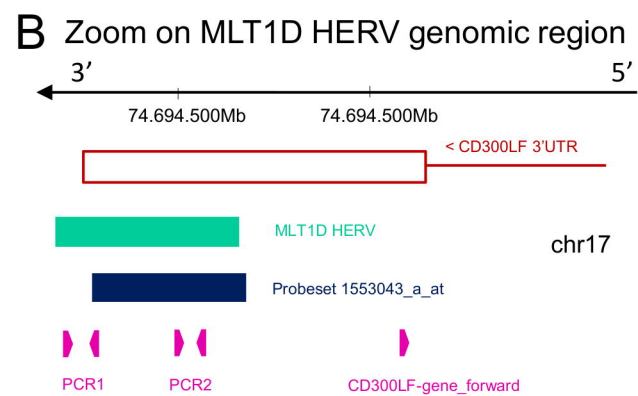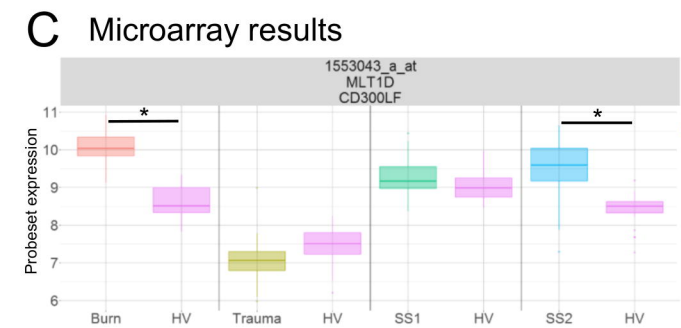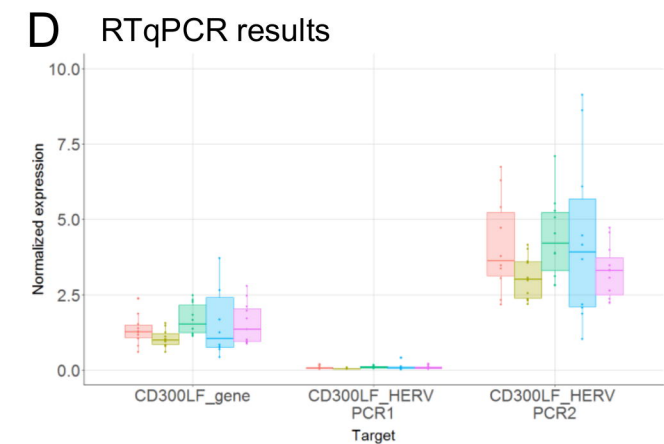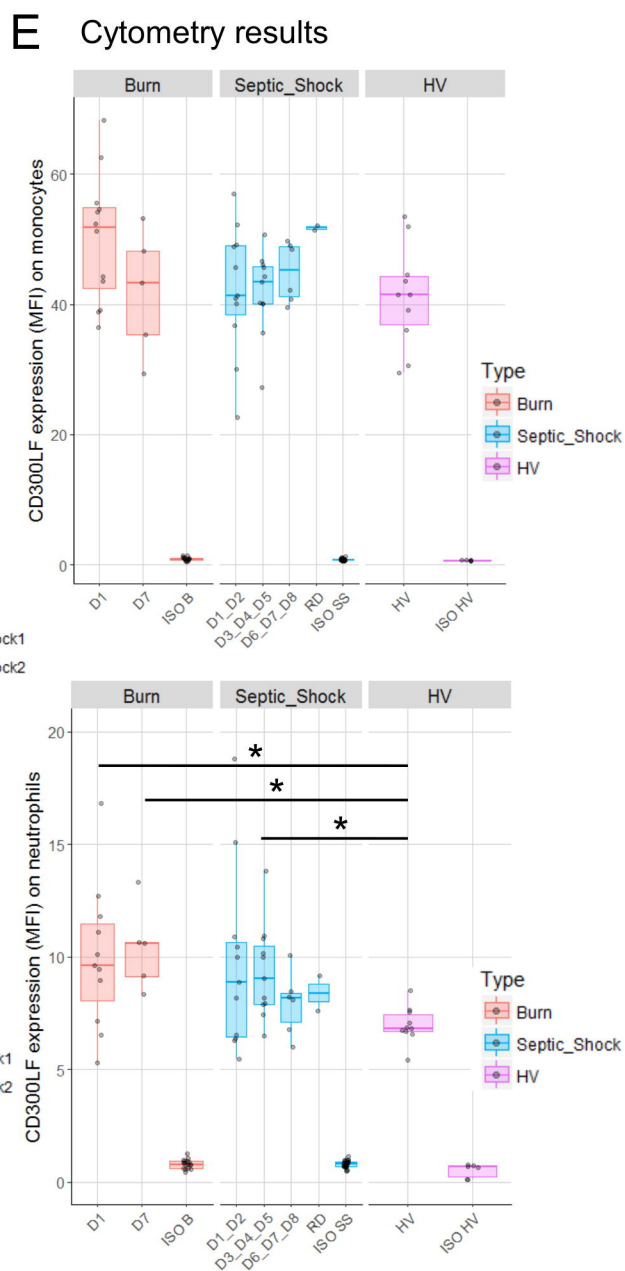

Source: https://www.biorxiv.org/content/early/2018/10/03/433029.full.pdf
